# Supplementary material for: Prognosis of oesophageal adenocarcinoma and squamous cell carcinoma following surgery and no surgery in a nationwide Swedish cohort study
Source: PubMed Central journal article supplement — BMJ Open. 2018 May 10;8(5):e021495. doi: 10.1136/bmjopen-2018-021495 (PMC5950652; doi:10.1136/bmjopen-2018-021495), 2018-05-10
Supplement: bmjopen-2018-021495.draft_revisions.pdf [file bmjopen-2018-021495.draft_revisions.pdf]

# BMJ Open

BMJ Open is committed to open peer review. As part of this commitment we make the peer review history of every article we publish publicly available.

When an article is published we post the peer reviewers' comments and the authors' responses online. We also post the versions of the paper that were used during peer review. These are the versions that the peer review comments apply to.

The versions of the paper that follow are the versions that were submitted during the peer review process. They are not the versions of record or the final published versions. They should not be cited or distributed as the published version of this manuscript.

BMJ Open is an open access journal and the full, final, typeset and author-corrected version of record of the manuscript is available on our site with no access controls, subscription charges or pay-per-view fees (<http://bmjopen.bmj.com>).

If you have any questions on BMJ Open's open peer review process please email [info.bmjopen@bmj.com](mailto:info.bmjopen@bmj.com)

# BMJ Open

## Prognosis of oesophageal adenocarcinoma and squamous cell carcinoma following surgery or no surgery in a population-based cohort study.

|                               |                                                                                                                                                                                                                                                                                                                                                                                                                                                                                                                                                                                                                   |
|-------------------------------|-------------------------------------------------------------------------------------------------------------------------------------------------------------------------------------------------------------------------------------------------------------------------------------------------------------------------------------------------------------------------------------------------------------------------------------------------------------------------------------------------------------------------------------------------------------------------------------------------------------------|
| Journal:                      | <i>BMJ Open</i>                                                                                                                                                                                                                                                                                                                                                                                                                                                                                                                                                                                                   |
| Manuscript ID                 | bmjopen-2018-021495                                                                                                                                                                                                                                                                                                                                                                                                                                                                                                                                                                                               |
| Article Type:                 | Research                                                                                                                                                                                                                                                                                                                                                                                                                                                                                                                                                                                                          |
| Date Submitted by the Author: | 04-Jan-2018                                                                                                                                                                                                                                                                                                                                                                                                                                                                                                                                                                                                       |
| Complete List of Authors:     | Kauppila, Joonas; Karolinska Institutet Department of Molecular Medicine and Surgery, ; Oulun Yliopisto Laaketieteellisen tiedekunta, Cancer and Translational Medicine Research Unit<br>Mattsson, Fredrik; Karolinska Institutet, Upper Gastrointestinal Research, Department of Molecular Medicine and Surgery<br>Brusselaers, Nele; Karolinska Institutet, Centre for Translational Microbiome Research, Department of Microbiology, Tumor and Cell Biology (MTC)<br>Lagergren, Jesper; Karolinska Institutet, Department of Molecular medicine and Surgery; King's College London, Division of Cancer Studies |
| Keywords:                     | Oesophageal disease < GASTROENTEROLOGY, Epidemiology < ONCOLOGY, Thoracic surgery < SURGERY                                                                                                                                                                                                                                                                                                                                                                                                                                                                                                                       |
|                               |                                                                                                                                                                                                                                                                                                                                                                                                                                                                                                                                                                                                                   |

SCHOLARONE™  
Manuscripts

1  
2  
3 **Prognosis of oesophageal adenocarcinoma and squamous cell carcinoma following**  
4 **surgery or no surgery in a population-based cohort study.**  
5

6  
7 **Authors:** Joonas H Kauppila, MD, PhD<sup>1,2</sup>, Fredrik Mattsson, MSc<sup>1</sup>, Nele Brusselaers, MD,  
8 PhD, MSc<sup>3</sup> and Jesper Lagergren, MD, PhD<sup>1,4</sup>.  
9

10  
11 **Affiliations:** <sup>1</sup>Upper Gastrointestinal Surgery, Department of Molecular medicine and  
12 Surgery, Karolinska Institutet, Karolinska University Hospital, 17176 Stockholm, Sweden,  
13 <sup>2</sup>Cancer and Translational Medicine Research Unit, Medical Research Center Oulu,  
14 University of Oulu, Oulu University Hospital, PO Box 5000, 90014, Oulu, Finland, <sup>3</sup>Centre  
15 for Translational Microbiome Research, Department of Microbiology, Tumor and Cell  
16 Biology (MTC), Karolinska Institutet, 17177 Stockholm, Sweden, <sup>4</sup>School of Cancer  
17 Sciences, King's College London and Guy's and St Thomas' NHS Foundation Trust, London  
18 SE1 9RT, England.  
19  
20  
21  
22  
23  
24  
25  
26  
27  
28  
29  
30

31 **Corresponding author:** Joonas H Kauppila, Upper Gastrointestinal Surgery, Department of  
32 Molecular Medicine and Surgery, Karolinska Institutet, Karolinska University Hospital,  
33 17176 Stockholm, Sweden Email: [joonas.kauppila@ki.se](mailto:joonas.kauppila@ki.se), Fax: +46 8-517 762 80  
34  
35  
36  
37  
38  
39  
40  
41  
42  
43  
44  
45  
46  
47  
48  
49  
50  
51  
52  
53  
54  
55  
56  
57  
58  
59  
60

## Abstract

**Objectives:** To assess the recent prognostic trends in oesophageal adenocarcinoma and oesophageal squamous cell carcinoma undergoing resectional surgery or no such surgery.

Additionally, risk factors for death were assessed in each of these patient groups.

**Design:** Cohort study

**Setting:** A population-based, nationwide study in Sweden.

**Participants:** All patients diagnosed with oesophageal adenocarcinoma and oesophageal squamous cell carcinoma in Sweden from January 1, 1990 to December 31, 2013, with follow up until May 14, 2017.

**Outcome measures:** Observed and relative (to the background population) 1-, 3- and 5 year survival were analysed using life table method. Multivariable Cox regression provided hazard ratios (HR) with 95% confidence intervals (95%CI) for risk factors of death.

**Results:** Among 3794 patients with oesophageal adenocarcinoma and 4631 with oesophageal squamous cell carcinoma, 82% and 63% were men, respectively. From 1990-1994 to 2010-2013, the relative 5-year survival increased from 12% to 15% for oesophageal adenocarcinoma and from 9% to 12% for oesophageal squamous cell carcinoma. The corresponding survival following surgery increased from 27% to 45% in oesophageal adenocarcinoma and from 24% to 43% in oesophageal squamous cell carcinoma. In non-operated patients, the survival increased from 3% to 4% for oesophageal adenocarcinoma and from 3% to 6% for oesophageal squamous cell carcinoma. Women with oesophageal squamous cell carcinoma had better prognosis than men both following surgery (HR 0.71, 95%CI 0.61-0.83) and no surgery (HR 0.86, 95%CI 0.81-0.93).

1  
2  
3 **Conclusions:** The prognosis has improved over calendar time both in surgically treated and  
4 non-operated patients with oesophageal adenocarcinoma and oesophageal squamous-cell  
5 carcinoma in Sweden. Women appear to have better prognosis in oesophageal squamous-cell  
6 carcinoma in Sweden. Women appear to have better prognosis in oesophageal squamous-cell  
7 carcinoma than men, independent of treatment.  
8  
9

10  
11  
12  
13  
14  
15 **Strengths and limitations of this study:**  
16

- 17  
18 - The main strength of the study is the population-based design with complete and accurate  
19 ascertainment and follow-up of all patients diagnosed with oesophageal cancer in Sweden.  
20  
21 - Valid estimation of disease-specific mortality was possible with highly accurate information  
22 on oesophageal cancer histology, surgical treatment, and date of death and the calculation of  
23 relative survival rates.  
24  
25 - The sample size was large enough to enable robust analyses of time trends in sub-groups of  
26 patients, and to assess risk factors of mortality.  
27  
28 - Limitations include the unavailability some clinical variables, such as neoadjuvant or  
29 adjuvant treatment.  
30  
31 - Tumor stage variable was unavailable before 2004, and complete for only surgically treated  
32 patients after 2004.  
33  
34  
35  
36  
37  
38  
39  
40  
41  
42  
43  
44

45 **Funding statement:** This work was supported by the Swedish Research Council  
46 (Vetenskapsrådet) (J.L.), the Swedish Cancer Society (Cancerfonden) (J.L.), Sigrid Jusélius  
47 Foundation (Sigrid Juséliuksen Säätiö) (J.H.K.) and Orion Research Foundation (Orionin  
48 Tutkimussäätiö) (J.H.K.). The funding sources had no role in the design and conduct of the  
49 study; collection, management, analysis, and interpretation of the data; preparation, review, or  
50 approval of the manuscript; or decision to submit the manuscript for publication.  
51  
52  
53  
54  
55  
56  
57  
58  
59  
60

1  
2  
3  
4  
5  
6 **Competing interests statement:** The authors state no potential competing interests.  
7  
8  
9

10 **Contributors:**

11  
12 The authors' contributions in the study were the following: The design of the study: JHK,  
13 FM, NB, JL; Data collection and preparation for analyses: FM and JL; Data analysis: FM;  
14  
15 Data interpretation: JHK, FM, NB, JL; Writing of first draft: JHK, revised and approved by  
16  
17 JHK, FM, NB, JL.  
18  
19  
20  
21  
22

23 **Data sharing statement:**

24 We are willing to share data upon request after ethical approval has been approved by the  
25  
26 relevant committee and the governmental agencies that maintain the data.  
27  
28  
29  
30  
31  
32  
33  
34  
35  
36  
37  
38  
39  
40  
41  
42  
43  
44  
45  
46  
47  
48  
49  
50  
51  
52  
53  
54  
55  
56  
57  
58  
59  
60

## Introduction

Oesophageal cancer is the 6<sup>th</sup> most common cause of cancer death worldwide.<sup>1</sup> The overall survival is poor; only 10-22% of patients survive 5 years after diagnosis.<sup>2-4</sup> Most studies have reported survival for oesophageal cancer in general, but despite that oesophageal adenocarcinoma and squamous-cell carcinoma are increasingly seen as separate diseases with different aetiologies, incidence trends, and treatments.<sup>5-9</sup>

The 5-year survival in oesophageal cancer patients has increased in both United States and Europe until 2007.<sup>10,11</sup> It is not known whether and how survival in oesophageal adenocarcinoma or squamous-cell carcinoma have changed during the last few years, and even more unclear is how this might have changed specifically in operated and non-operated patients. Sweden provides an excellent setting to answer these questions, because of its accurate and complete nationwide registries.<sup>12,13</sup>

This nationwide Swedish study was conducted with the aim of assessing survival in oesophageal adenocarcinoma and squamous-cell carcinoma separately, and also specifically for resectional surgery (oesophagectomy) and no such surgery. Additionally, risk factors for death were assessed in each of these patient groups.

## Methods

### Design

This was a nationwide Swedish population-based cohort study, including all patients diagnosed with oesophageal adenocarcinoma or squamous-cell carcinoma from January 1, 1990, through December 31, 2013, with follow-up for survival until May 14, 2017. All newly diagnosed patients were identified from the Swedish Cancer Registry, while information about surgery was retrieved from the Swedish Patient Registry, and mortality from the Swedish Causes of Death Registry. The reporting to these registries is required according to Swedish law. Patient data was linked by the unique personal identity numbers assigned to each resident in Sweden, which are ideal for registry-based research.<sup>12</sup> The study was approved by the Regional Ethical Review Board in Stockholm, Sweden (2015/1916-31/1).

### Data collection

*The Swedish Cancer Registry* was used to identify the study patients. The nationwide completeness for recording of oesophageal cancer was 98% and the histological confirmation was 100%.<sup>13</sup> The diagnosis codes 150.0, 150.8, and 150.9 in the 7<sup>th</sup> version of the International Classification of Diseases (ICD-7) were used to identify patients with oesophageal cancer. The histology codes (WHO/HS/CANC/24.1 Histology Code) were used to separate patients with oesophageal adenocarcinoma (096) and squamous cell carcinoma (146). Tumour stage has been recorded in the Swedish Cancer Registry from June 2004 onwards. The tumour stage variable is >98% concordant with patient records for operated oesophageal cancer patients.<sup>14</sup> The tumour stage classification in the registry was completed according to the 6<sup>th</sup> edition of the Union Internationale Contre le Cancer.<sup>15</sup>



1  
2  
3 *The Swedish Patient Registry* was used to identify all patients who underwent resectional  
4 surgery and also to assess comorbidities at the time of diagnosis.<sup>16</sup> The Swedish Classification  
5 of Operations and Major Procedures was used to identify the relevant operation codes  
6 (oesophagectomy codes 2820-2829 in 1990-1997 and codes JCC00-JCC97 in 1997-2014 and  
7 oesophagogastrectomy and gastrectomy codes 4411-4435 in 1990-1997 and codes JDC00-  
8 JDD96 in 1997-2014). Except for oesophagectomy codes, gastrectomy codes were included,  
9 because some surgeons tend to combine oesophagectomy with gastrectomy in locally  
10 advanced cancer. Operation codes referring to oesophagogastrectomy or gastrectomy were  
11 found in a total of 78 (0.9%) patients. The positive predictive value for oesophageal cancer  
12 resection has been estimated at 99.6% in the Swedish Patient Registry.<sup>17</sup>  
13  
14  
15  
16  
17  
18  
19  
20  
21  
22  
23  
24  
25

26 Comorbidities were defined according to the well-validated Charlson Comorbidity Index,<sup>18</sup>  
27 not including the oesophageal cancer or metastatic solid tumours. The comorbidity  
28 information was retrieved from hospital admissions in the Patient Registry, which is at least  
29 95% complete for most comorbidities,<sup>19</sup> up to three years before the index admission or  
30 cancer diagnosis  
31  
32  
33  
34  
35  
36  
37  
38

39 *The Swedish Causes of Death Registry* was used to obtain mortality. This registry contains  
40 100% complete information on date of death for all deceased Swedish residents from 1952  
41 onwards.<sup>20</sup>  
42  
43  
44  
45  
46  
47

### 48 **Statistical analysis**

49  
50 An experienced biostatistician (F.M.) conducted all data management and statistical analysis  
51 according to a detailed and pre-defined study protocol. All analyses were conducted using  
52 SAS (version 9.4, SAS Institute Inc., Cary, NC). Observed and relative survival was  
53  
54  
55  
56  
57  
58  
59  
60

1  
2  
3 presented for survival at 1 and 5 years following a diagnosis date of oesophageal  
4  
5 adenocarcinoma or squamous cell carcinoma. Observed survival with 95% confidence  
6  
7 intervals (CI) was estimated using the life-table method,<sup>21</sup> where the event was defined as  
8  
9 death by any cause (all-cause mortality).  
10

11  
12 To assess disease-specific mortality, relative survival with 95% CIs was calculated as the ratio  
13  
14 of observed to the expected survival. The expected survival was derived from the survival in  
15  
16 the general Swedish population of the same age (per year), sex, and calendar year as the  
17  
18 patients with oesophageal cancer. Both observed and relative survival was presented as  
19  
20 percentages (%). The survival in the general Swedish population was available from the start  
21  
22 of the study period until the end of 2015, and for the calculation of relative survival rates for  
23  
24 the years 2016 and 2017 the mortality rates from 2015 were used. The results were analysed  
25  
26 for all patients independent of treatment and also stratified by resectional surgery (yes or no).  
27  
28

29  
30 The observed survival was stratified by calendar periods (year 1990-1994, 1995-1999, 2000-  
31  
32 2004, 2005-2009, or 2010-2013), age (<60, 60-69, 70-79, or  $\geq 80$  years), sex (male or female),  
33  
34 and Charlson Comorbidity Index<sup>18</sup> score (0, 1, or  $\geq 2$ ). Surgically treated patients were further  
35  
36 stratified for tumour stage (0-I, II, or III-IV) from the year 2005 onwards, when tumour stage  
37  
38 data were available and of high completeness. Cox regression was used to calculate crude and  
39  
40 adjusted hazard ratios (HR) with 95% CIs for each of the aforementioned stratification  
41  
42 variables (calendar period, age, sex, Charlson Comorbidity Index score and tumour stage)  
43  
44 with the same categorisation. The estimates were mutually adjusted for the risk factors where  
45  
46 indicated. The missing data for tumour stage were assumed to be missing at random and were  
47  
48 dealt with using complete case analysis.  
49  
50  
51  
52  
53  
54  
55  
56  
57  
58  
59  
60

## Results

### Patients

A total of 3794 patients were diagnosed with oesophageal adenocarcinoma during the study period, including 1131 (30%) who had undergone oesophagectomy. Among all 4631 patients diagnosed with oesophageal squamous cell carcinoma, 1116 (24%) had undergone oesophagectomy. Men were overrepresented in both oesophageal adenocarcinoma group (82%), and squamous cell carcinoma group (63%). The number of oesophageal adenocarcinoma patients increased throughout the study period, while the number of oesophageal squamous cell carcinoma patients decreased (Table 1). The proportion of adenocarcinoma patients who underwent oesophagectomy decreased from 38% in 1990-1994 to 27% in 2010-2013, and for squamous-cell carcinoma patients this proportion decreased from 31% in 1990-1994 to 18% in 2010-2013 (Table 1).

### Survival trends in oesophageal adenocarcinoma

Because the observed survival closely mirrored the relative survival (Table 1), only the results regarding relative survival are commented on here.

#### *All patients*

The relative survival in oesophageal adenocarcinoma improved during the study period; the 1-year survival increased from 35% in 1990-1994 to 41% in 2010-2013 (with follow-up to 2017), and the corresponding 5-year survival gradually increased from 12% to 15%. (Table 1). From the year 2000 onwards, the relative 5-year survival increased by 2% (Table 1).

#### *Surgically treated patients*

1  
2  
3 The relative survival increased substantially in surgically treated patients. In the  
4 oesophagectomy group, the 1-year survival increased from 54% in 1990-1994 to 86% in  
5 2010-2013 (with follow-up until 2017), and the corresponding 5-year survival increased from  
6 27% to 45% (Table 1, Figure 1). From the year 2000 onwards, the relative 1-year survival  
7 increased by 11% and the 5-year survival by 12% (Table 1).  
8  
9  
10  
11  
12

### 13 14 15 16 *Non-operated patients*

17  
18 In the non-operated group, the 1-year survival increased from 24% in 1990-1994 to 25% in  
19 2010-2013 (with follow-up to 2017), and the corresponding 5-year survival increased from  
20 3% to 4% (Table 1, Figure 1). From 2000 onwards the 1- and 5-year survival estimates were  
21 stable (Table 1).  
22  
23  
24  
25  
26  
27  
28

### 29 **Survival trends in oesophageal squamous-cell carcinoma**

#### 30 31 *All patients*

32  
33 Also the relative survival in oesophageal squamous cell carcinoma improved over time. The  
34 relative 1-year survival increased from 32% in 1990-1994 to 36% in 2010-2013 (with follow-  
35 up until 2017), and the corresponding 5-year survival increased from 9% to 12% (Table 1).  
36  
37 From the year 2000 onwards the relative 1-year survival increased by 1%, and the 5-year  
38 survival increased by 3% (Table 1).  
39  
40  
41  
42  
43  
44  
45

#### 46 *Surgically treated patients*

47  
48 The 1-year relative survival of surgically treated patients increased from 60% in 1990-1994 to  
49 87% in 2010-2013 (with follow-up until 2017), and the corresponding 5-year survival  
50 increased from 24% to 43% (Table 1, Figure 2). From the year 2000 onwards both 1- and 5-  
51 year survival increased by 14% (Table 1).  
52  
53  
54  
55  
56  
57  
58  
59  
60

### *Non-operated patients*

The relative 1-year survival in non-surgically treated patients was 20% in 1990-1994 and 25% in 2010-2013 (with follow-up until 2017), and the corresponding 5-year survival doubled from 3% to 6% (Table 1, Figure 2). From the year 2000 onwards both 1-and 5-year survival increased by 2% (Table 1).

### **Risk factors for 5-year mortality in oesophageal adenocarcinoma**

#### *All patients*

In the multivariable analysis of all oesophageal adenocarcinoma patients, the adjusted HR of mortality within 5 years of diagnosis was higher in earlier calendar periods (HR 1.17, 95%CI 1.02-1.33, first versus last calendar period), older age groups (HR 1.99, 95%CI 1.78-2.22, age  $\geq 80$  years versus  $< 60$  years), and in patients with more comorbidity (HR 1.27, 95%CI 1.15-1.40,  $\geq 2$  comorbidities versus no comorbidities), while sex did not influence the HR of mortality (Table 2).

#### *Surgically treated patients*

Among the oesophageal adenocarcinoma patients who underwent oesophagectomy, earlier calendar period (HR 2.02, 95%CI 1.56-2.61, first versus last calendar period) and older age (HR 1.98, 95%CI 1.41-2.77, age  $\geq 80$  years versus  $< 60$  years) were associated with an increased risk of mortality, while comorbidity and sex did not statistically significantly influence this risk (Table 2).

In a sub-analysis of patients diagnosed between 2005 and 2013, i.e. when tumour stage data were available and adjusted for, higher tumour stage and older age were statistically significant poor prognostic factors (Table 3).

### *Non-operated patients*

Among the non-operated oesophageal adenocarcinoma patients, older age (HR 1.21, 95%CI 1.06-1.37, age  $\geq$ 80 years versus  $<$ 60 years) was the only factor associated with an increased risk of mortality (Table 2).

### **Risk factors for 5-year mortality in oesophageal squamous-cell carcinoma**

#### *All patients*

The multivariable analysis in all oesophageal squamous cell carcinoma patients showed that risk factors for 5-year mortality were earlier calendar period (HR 1.19, 95%CI 1.07-1.31, first versus last calendar period), older age (HR 2.06, 95%CI 1.86-2.28, age  $\geq$ 80 years versus  $<$ 60 years), male sex (HR 0.83, 95%CI 0.78-0.89, women versus men), and comorbidity (HR 1.45, 95%CI 1.32-1.59,  $\geq$ 2 comorbidities versus no comorbidities) (Table 2).

#### *Surgically treated patients*

Among the oesophageal squamous cell carcinoma patients who underwent oesophagectomy, earlier calendar period (HR 2.03, 95%CI 1.56-2.63, first versus last calendar period), older age (HR 2.06, 95%CI 1.86-2.28, age  $\geq$ 80 years versus  $<$ 60 years), and male sex (HR 0.71, 95%CI 0.61-0.83, women versus men) were associated with an increased risk of mortality, while comorbidity did not statistically significantly influence this risk (Table 2). In a sub-analysis of patients diagnosed between 2005 to 2013, i.e. when tumour stage data were available and adjusted for, more advanced tumour stage, earlier calendar period, older age, male sex, and more comorbidity were poor prognostic factors in oesophageal squamous cell carcinoma (Table 3).

1  
2  
3 *Non-operated patients*

4  
5 Among the non-operated oesophageal squamous cell carcinoma patients, earlier calendar  
6  
7 period (HR 1.24, 95%CI 1.11-1.39, first versus last calendar period), older age (HR 1.42,  
8  
9 95%CI 1.26-1.60, age  $\geq$ 80 years versus  $<$ 60 years), male sex (HR 0.86, 95%CI 0.81-0.93,  
10  
11 women versus men), and comorbidity (HR 1.30, 95%CI 1.18-1.43,  $\geq$ 2 comorbidities versus  
12  
13 no comorbidities) were associated with an increased risk of mortality (Table 2).  
14  
15  
16  
17  
18  
19  
20  
21  
22  
23  
24  
25  
26  
27  
28  
29  
30  
31  
32  
33  
34  
35  
36  
37  
38  
39  
40  
41  
42  
43  
44  
45  
46  
47  
48  
49  
50  
51  
52  
53  
54  
55  
56  
57  
58  
59  
60

## Discussion

This study indicates that the overall prognosis of both oesophageal adenocarcinoma and oesophageal squamous cell carcinoma is improving over time, especially in the operated patients. Female patients with oesophageal squamous cell carcinoma had better prognosis than male patients.

Among strengths of the study is the population-based design with complete and accurate ascertainment and follow-up of all patients diagnosed with oesophageal cancer in Sweden. The assessment of the oesophageal cancer histology, surgical treatment, and date of death was highly accurate and the calculation of relative survival rates allowed valid estimation of disease-specific mortality. The sample size was large enough to enable robust analyses of time trends in sub-groups of patients, and to assess risk factors of mortality. Limitations include the unavailability of some clinical variables, such as use of neoadjuvant or adjuvant treatment. Tumour stage data were available only after 2004 and complete only in patients who had undergone surgery. However, the main purpose of the study was to evaluate time trends in survival and to separate these trends into patients who had undergone surgery or not, which was fully possible to achieve.

Previously, a registry-based study from United States showed an increase in 5-year overall survival in oesophageal cancer patients from 18% in 1990s to 22% in 2000s.<sup>10</sup> A European registry-based study (EUROCORE-5) also showed improvement in 5-year overall age-standardised survival rates in oesophageal cancer from 10% in 1999-2001 to 13% in 2005-2007.<sup>11</sup> In China, the age-standardised 5-year relative survival rate for oesophageal cancer was 21% in 2003-2005.<sup>22</sup> Taken together, earlier studies have shown improving prognosis in



oesophageal cancer over time. However, they reported only on earlier calendar periods, and information on histology- or treatment-specific survival were lacking.

The findings of increasing survival over time in both oesophageal adenocarcinoma and oesophageal squamous cell carcinoma despite a decreasing utilisation of oesophagectomy are encouraging. Increased awareness and diagnostic developments might explain the improved prognosis. The treatment might have been improved by centralisation of surgery,<sup>23,24</sup> use of neoadjuvant chemoradiotherapy<sup>25,26</sup> or definitive chemoradiotherapy.<sup>27</sup> The more clearly improved 5-year survival in patients with non-surgically managed oesophageal squamous cell carcinoma patients might be due to a higher sensitivity to chemoradiotherapy in oesophageal squamous cell carcinoma, resulting in a higher success rate of definite oncological therapy.<sup>28,29</sup> Additionally, careful selection of treatment for the elderly, co-morbid and frail patients by the multidisciplinary teams, preoperative optimisation of patients and improved peri- and postoperative care are likely reasons for improved survival.

The better prognosis in women with oesophageal squamous cell carcinoma was unexpected. However, some earlier population-based studies have associated female sex with favourable prognosis in oesophageal cancer,<sup>30-32</sup> although these studies did not separate the histological subtypes, tumour stage, or treatment strategies.<sup>33</sup> In the present study, female sex was a strong positive predictor of survival in both surgically and non-surgically treated patients with oesophageal squamous cell carcinoma, also after adjustment. A possible biological mechanism for a sex difference is estrogenic influence, which could inhibit cancer cell growth.<sup>34-36</sup> Additionally, hormone replacement therapy associates to lower risk of oesophageal squamous cell carcinoma.<sup>37,38</sup> The sex differences in survival after oesophageal squamous cell carcinoma might also be due to differences in socioeconomic and lifestyle

1  
2  
3 factors, which could not be adjusted for in the present study, and should be specifically  
4  
5 examined in future studies.  
6  
7

8  
9 The treatment of oesophageal cancer in the Swedish publicly funded healthcare system  
10 follows clinical guidelines, including neoadjuvant therapy and centralisation to fewer  
11 hospitals during the last years. Thus, the findings of the present study should be generalisable  
12 to many other countries with a similar healthcare system as in Sweden. These findings  
13 encourage careful selection of patients undergoing surgery, multidisciplinary management,  
14 centralisation of services, and use of neoadjuvant treatment in surgical candidates, and  
15 definitive chemoradiotherapy in patients ineligible for surgery.  
16  
17  
18  
19  
20  
21  
22  
23  
24  
25

26 In conclusion, this nationwide Swedish study with complete ascertainment and follow-up of  
27 patients with oesophageal cancer shows that the prognosis in both oesophageal  
28 adenocarcinoma and oesophageal squamous cell carcinoma is improving. The improved  
29 prognosis is stronger in surgically managed patients, but is also indicated in non-operated  
30 patients. Non-operated patients still have a poor prognosis. The favourable prognosis in  
31 women with oesophageal squamous cell carcinoma warrants further research.  
32  
33  
34  
35  
36  
37  
38  
39  
40  
41  
42  
43  
44  
45  
46  
47  
48  
49  
50  
51  
52  
53  
54  
55  
56  
57  
58  
59  
60

## References

1. Global Burden of Disease Cancer C, Fitzmaurice C, Allen C, et al. Global, Regional, and National Cancer Incidence, Mortality, Years of Life Lost, Years Lived With Disability, and Disability-Adjusted Life-years for 32 Cancer Groups, 1990 to 2015: A Systematic Analysis for the Global Burden of Disease Study. *JAMA Oncol.* Apr 01 2017;3(4):524-548.
2. Gavin AT, Francisci S, Foschi R, et al. Oesophageal cancer survival in Europe: a EURO CARE-4 study. *Cancer Epidemiol.* Dec 2012;36(6):505-512.
3. Dubecz A, Gall I, Solymosi N, et al. Temporal trends in long-term survival and cure rates in esophageal cancer: a SEER database analysis. *J Thorac Oncol.* Feb 2012;7(2):443-447.
4. Lagergren J, Mattsson F. Diverging trends in recent population-based survival rates in oesophageal and gastric cancer. *PLoS One.* 2012;7(7):e41352.
5. Napier KJ, Scheerer M, Misra S. Esophageal cancer: A Review of epidemiology, pathogenesis, staging workup and treatment modalities. *World J Gastrointest Oncol.* May 15 2014;6(5):112-120.
6. Lagergren J, Smyth E, Cunningham D, Lagergren P. Oesophageal cancer. *Lancet.* Jun 22 2017.
7. Lagergren J, Lagergren P. Recent developments in esophageal adenocarcinoma. *CA Cancer J Clin.* Jul-Aug 2013;63(4):232-248.
8. Brown LM, Hoover RN, Greenberg RS, et al. Are racial differences in squamous cell esophageal cancer explained by alcohol and tobacco use? *J Natl Cancer Inst.* Sep 07 1994;86(17):1340-1345.
9. Gupta B, Kumar N. Worldwide incidence, mortality and time trends for cancer of the oesophagus. *Eur J Cancer Prev.* Mar 2017;26(2):107-118.
10. Njei B, McCarty TR, Birk JW. Trends in esophageal cancer survival in United States adults from 1973 to 2009: A SEER database analysis. *J Gastroenterol Hepatol.* Jun 2016;31(6):1141-1146.
11. Anderson LA, Tavilla A, Brenner H, et al. Survival for oesophageal, stomach and small intestine cancers in Europe 1999-2007: results from EURO CARE-5. *Eur J Cancer.* Sep 05 2015.
12. Ludvigsson JF, Otterblad-Olausson P, Pettersson BU, Ekbom A. The Swedish personal identity number: possibilities and pitfalls in healthcare and medical research. *Eur J Epidemiol.* 2009;24(11):659-667.
13. Lindblad M, Ye W, Lindgren A, Lagergren J. Disparities in the classification of esophageal and cardia adenocarcinomas and their influence on reported incidence rates. *Ann Surg.* Apr 2006;243(4):479-485.
14. Brusselaers N, Vall A, Mattsson F, Lagergren J. Tumour staging of oesophageal cancer in the Swedish Cancer Registry: A nationwide validation study. *Acta Oncol.* Jun 2015;54(6):903-908.
15. Greene FL, Sobin LH. The TNM system: our language for cancer care. *J Surg Oncol.* Jul 2002;80(3):119-120.
16. Naessen T, Parker R, Persson I, Zack M, Adami HO. Time trends in incidence rates of first hip fracture in the Uppsala Health Care Region, Sweden, 1965-1983. *Am J Epidemiol.* Aug 1989;130(2):289-299.
17. Lagergren K, Derogar M. Validation of oesophageal cancer surgery data in the Swedish Patient Registry. *Acta Oncol.* Jan 2012;51(1):65-68.

- 1
  - 2
  - 3
  - 4
  - 5
  - 6
  - 7
  - 8
  - 9
  - 10
  - 11
  - 12
  - 13
  - 14
  - 15
  - 16
  - 17
  - 18
  - 19
  - 20
  - 21
  - 22
  - 23
  - 24
  - 25
  - 26
  - 27
  - 28
  - 29
  - 30
  - 31
  - 32
  - 33
  - 34
  - 35
  - 36
  - 37
  - 38
  - 39
  - 40
  - 41
  - 42
  - 43
  - 44
  - 45
  - 46
  - 47
  - 48
  - 49
  - 50
  - 51
  - 52
  - 53
  - 54
  - 55
  - 56
  - 57
  - 58
  - 59
  - 60
18. Armitage JN, van der Meulen JH, Royal College of Surgeons Co-morbidity Consensus G. Identifying co-morbidity in surgical patients using administrative data with the Royal College of Surgeons Charlson Score. *Br J Surg*. May 2010;97(5):772-781.
19. Ludvigsson JF, Andersson E, Ekbom A, et al. External review and validation of the Swedish national inpatient register. *BMC Public Health*. Jun 09 2011;11:450.
20. Brooke HL, Talback M, Hornblad J, et al. The Swedish cause of death register. *Eur J Epidemiol*. Sep 2017;32(9):765-773.
21. Cutler SJ, Ederer F. Maximum utilization of the life table method in analyzing survival. *J Chronic Dis*. Dec 1958;8(6):699-712.
22. Zeng H, Zheng R, Guo Y, et al. Cancer survival in China, 2003-2005: a population-based study. *Int J Cancer*. Apr 15 2015;136(8):1921-1930.
23. Brusselaers N, Mattsson F, Lagergren J. Hospital and surgeon volume in relation to long-term survival after oesophagectomy: systematic review and meta-analysis. *Gut*. Sep 2014;63(9):1393-1400.
24. Derogar M, Sadr-Azodi O, Johar A, Lagergren P, Lagergren J. Hospital and surgeon volume in relation to survival after esophageal cancer surgery in a population-based study. *J Clin Oncol*. Feb 10 2013;31(5):551-557.
25. Sjoquist KM, Burmeister BH, Smithers BM, et al. Survival after neoadjuvant chemotherapy or chemoradiotherapy for resectable oesophageal carcinoma: an updated meta-analysis. *Lancet Oncol*. Jul 2011;12(7):681-692.
26. Little AG, Lerut AE, Harpole DH, et al. The Society of Thoracic Surgeons practice guidelines on the role of multimodality treatment for cancer of the esophagus and gastroesophageal junction. *Ann Thorac Surg*. Nov 2014;98(5):1880-1885.
27. Pottgen C, Stuschke M. Radiotherapy versus surgery within multimodality protocols for esophageal cancer--a meta-analysis of the randomized trials. *Cancer Treat Rev*. Oct 2012;38(6):599-604.
28. Stahl M, Stuschke M, Lehmann N, et al. Chemoradiation with and without surgery in patients with locally advanced squamous cell carcinoma of the esophagus. *J Clin Oncol*. Apr 01 2005;23(10):2310-2317.
29. Kleinberg L, Forastiere AA. Chemoradiation in the management of esophageal cancer. *J Clin Oncol*. Sep 10 2007;25(26):4110-4117.
30. Bohanes P, Yang D, Chhibar RS, et al. Influence of sex on the survival of patients with esophageal cancer. *J Clin Oncol*. Jun 20 2012;30(18):2265-2272.
31. Ellison LF. Differences in cancer survival in Canada by sex. *Health Rep*. Apr 2016;27(4):19-27.
32. Bus P, Lemmens VE, van Oijen MG, et al. Prognostic factors for medium- and long-term survival of esophageal cancer patients in the Netherlands. *J Surg Oncol*. Apr 2014;109(5):465-471.
33. Zhang J, Garfield D, Jiang Y, Wang S, Chen S, Chen H. Does sex affect survival of patients with squamous cell esophageal cancer? *J Clin Oncol*. Feb 20 2013;31(6):815-816.
34. Ueo H, Matsuoka H, Sugimachi K, Kuwano H, Mori M, Akiyoshi T. Inhibitory effects of estrogen on the growth of a human esophageal carcinoma cell line. *Cancer Res*. Nov 15 1990;50(22):7212-7215.
35. Utsumi Y, Nakamura T, Nagasue N, Kubota H, Morikawa S. Role of estrogen receptors in the growth of human esophageal carcinoma. *Cancer*. Jul 01 1989;64(1):88-93.

- 1  
2  
3 **36.** Nozoe T, Oyama T, Takenoyama M, Hanagiri T, Sugio K, Yasumoto K. Significance  
4 of immunohistochemical expression of estrogen receptors alpha and beta in  
5 squamous cell carcinoma of the esophagus. *Clin Cancer Res.* Jul 15  
6 2007;13(14):4046-4050.
- 7 **37.** Wang BJ, Zhang B, Yan SS, et al. Hormonal and reproductive factors and risk of  
8 esophageal cancer in women: a meta-analysis. *Dis Esophagus.* Jul 2016;29(5):448-  
9 454.
- 10 **38.** Brusselaers N, Maret-Ouda J, Konings P, El-Serag HB, Lagergren J. Menopausal  
11 hormone therapy and the risk of esophageal and gastric cancer. *Int J Cancer.* Apr  
12 01 2017;140(7):1693-1699.  
13  
14  
15  
16  
17  
18  
19  
20  
21  
22  
23  
24  
25  
26  
27  
28  
29  
30  
31  
32  
33  
34  
35  
36  
37  
38  
39  
40  
41  
42  
43  
44  
45  
46  
47  
48  
49  
50  
51  
52  
53  
54  
55  
56  
57  
58  
59  
60

For peer review only

**Table 1:** Observed and relative 1- and 5-year survival across calendar periods in oesophageal adenocarcinoma and squamous cell carcinoma, stratified by treatment strategy in 1990-2013, with follow-up until 2017.

| Calendar period     | Oesophageal adenocarcinoma |          |                                 |            |                                 |            | Oesophageal squamous cell carcinoma |          |                                 |            |                                 |            |
|---------------------|----------------------------|----------|---------------------------------|------------|---------------------------------|------------|-------------------------------------|----------|---------------------------------|------------|---------------------------------|------------|
|                     | Patients                   |          | Observed survival in % (95% CI) |            | Relative survival in % (95% CI) |            | Patients                            |          | Observed survival in % (95% CI) |            | Relative survival in % (95% CI) |            |
|                     | Number (%)                 | Mean age | 1 year                          | 5 year     | 1 year                          | 5 year     | Number (%)                          | Mean age | 1 year                          | 5 year     | 1 year                          | 5 year     |
| <b>All patients</b> |                            |          |                                 |            |                                 |            |                                     |          |                                 |            |                                 |            |
| 1990-1994           | 332 (9)                    | 71       | 33 (28-39)                      | 10 (7-14)  | 35 (30-41)                      | 12 (8-16)  | 1148 (25)                           | 70       | 31 (28-33)                      | 8 (6-9)    | 32 (29-35)                      | 9 (7-11)   |
| 1995-1999           | 557 (15)                   | 70       | 35 (31-39)                      | 11 (8-13)  | 37 (33-41)                      | 13 (10-16) | 1014 (22)                           | 70       | 32 (29-35)                      | 10 (8-12)  | 33 (30-36)                      | 12 (9-14)  |
| 2000-2004           | 860 (23)                   | 70       | 39 (36-43)                      | 11 (9-13)  | 41 (38-45)                      | 13 (11-16) | 931 (20)                            | 70       | 34 (30-37)                      | 7 (6-9)    | 35 (32-38)                      | 9 (7-11)   |
| 2005-2009           | 1054 (28)                  | 69       | 39 (36-42)                      | 12 (10-14) | 41 (38-44)                      | 14 (12-16) | 861 (19)                            | 70       | 34 (30-37)                      | 10 (8-12)  | 35 (32-38)                      | 11 (9-14)  |
| 2010-2013           | 991 (26)                   | 71       | 40 (37-43)                      | 13 (11-15) | 41 (38-45)                      | 15 (12-17) | 677 (15)                            | 70       | 34 (31-38)                      | 11 (9-13)  | 36 (32-39)                      | 12 (10-15) |
| <b>Surgery</b>      |                            |          |                                 |            |                                 |            |                                     |          |                                 |            |                                 |            |
| 1990-1994           | 126 (11)                   | 66       | 51 (42-60)                      | 22 (15-29) | 54 (44-63)                      | 27 (18-36) | 346 (31)                            | 65       | 57 (52-62)                      | 20 (15-24) | 60 (55-66)                      | 24 (19-29) |
| 1995-1999           | 191 (17)                   | 65       | 68 (61-75)                      | 29 (22-35) | 72 (65-79)                      | 35 (27-42) | 275 (25)                            | 64       | 64 (59-70)                      | 25 (20-31) | 68 (62-74)                      | 31 (24-37) |
| 2000-2004           | 275 (24)                   | 66       | 72 (67-78)                      | 27 (21-32) | 76 (71-82)                      | 31 (25-37) | 183 (16)                            | 65       | 69 (63-76)                      | 25 (18-31) | 73 (66-80)                      | 29 (22-36) |
| 2005-2009           | 277 (24)                   | 64       | 79 (75-84)                      | 38 (32-43) | 83 (78-88)                      | 43 (36-49) | 193 (17)                            | 64       | 70 (64-77)                      | 29 (23-35) | 74 (67-80)                      | 33 (26-41) |
| 2010-2013           | 262 (23)                   | 66       | 83 (78-87)                      | 40 (34-46) | 86 (82-91)                      | 45 (38-51) | 119 (11)                            | 66       | 83 (76-90)                      | 39 (30-48) | 87 (80-94)                      | 43 (33-54) |
| <b>No surgery</b>   |                            |          |                                 |            |                                 |            |                                     |          |                                 |            |                                 |            |
| 1990-1994           | 206 (8)                    | 74       | 23 (17-29)                      | 3 (0-5)    | 24 (18-30)                      | 3 (0-6)    | 802 (23)                            | 72       | 19 (16-22)                      | 2 (1-3)    | 20 (17-23)                      | 3 (1-4)    |
| 1995-1999           | 366 (14)                   | 72       | 18 (14-22)                      | 1 (0-2)    | 19 (15-23)                      | 1 (0-2)    | 739 (21)                            | 72       | 19 (17-22)                      | 4 (2-5)    | 21 (18-24)                      | 5 (3-6)    |
| 2000-2004           | 585 (22)                   | 72       | 24 (20-27)                      | 4 (2-6)    | 25 (21-29)                      | 5 (3-7)    | 748 (21)                            | 72       | 25 (22-28)                      | 3 (2-5)    | 26 (23-29)                      | 4 (2-5)    |
| 2005-2009           | 777 (29)                   | 71       | 24 (21-27)                      | 3 (2-5)    | 25 (22-29)                      | 4 (2-5)    | 668 (19)                            | 71       | 23 (20-26)                      | 4 (3-6)    | 24 (21-27)                      | 5 (3-7)    |
| 2010-2013           | 729 (27)                   | 73       | 24 (21-27)                      | 3 (2-5)    | 25 (22-29)                      | 4 (2-5)    | 558 (16)                            | 71       | 24 (20-27)                      | 5 (3-7)    | 25 (21-29)                      | 6 (4-8)    |

**Table 2:** Observed 5-year survival and adjusted hazard ratios (HR) with 95% confidence intervals (CI) for oesophageal adenocarcinoma and oesophageal squamous-cell carcinoma in 1990-2013, with follow-up until 2017.

|                     |           | Oesophageal adenocarcinoma |                          |                  | Oesophageal squamous-cell carcinoma |                          |                  |
|---------------------|-----------|----------------------------|--------------------------|------------------|-------------------------------------|--------------------------|------------------|
| Covariate           | Category  | Patients Number (%)        | 5-year survival (95% CI) | HR (95% CI)*     | Patients Number (%)                 | 5-year survival (95% CI) | HR (95% CI)*     |
| <b>All patients</b> |           |                            |                          |                  |                                     |                          |                  |
| Calendar period     | 1990-1994 | 332 (9)                    | 10 (7-14)                | 1.17 (1.02-1.33) | 1148 (25)                           | 8 (6-9)                  | 1.19 (1.07-1.31) |
|                     | 1995-1999 | 557 (15)                   | 11 (8-13)                | 1.11 (0.99-1.24) | 1014 (22)                           | 10 (8-12)                | 1.11 (1.00-1.23) |
|                     | 2000-2004 | 860 (23)                   | 11 (9-13)                | 1.07 (0.97-1.18) | 931 (20)                            | 7 (6-9)                  | 1.13 (1.01-1.25) |
|                     | 2005-2009 | 1054 (28)                  | 12 (10-14)               | 1.04 (0.94-1.16) | 861 (19)                            | 10 (8-12)                | 1.07 (0.96-1.19) |
|                     | 2010-2013 | 991 (26)                   | 13 (11-15)               | 1 (reference)    | 677 (15)                            | 11 (9-13)                | 1 (reference)    |
| Age (years)         | <60       | 686 (18)                   | 18 (15-21)               | 1 (reference)    | 787 (17)                            | 14 (12-17)               | 1 (reference)    |
|                     | 60-69     | 1079 (28)                  | 16 (13-18)               | 1.05 (0.94-1.16) | 1344 (29)                           | 12 (10-14)               | 1.11 (1.01-1.22) |
|                     | 70-79     | 1166 (31)                  | 12 (10-13)               | 1.25 (1.13-1.39) | 1588 (34)                           | 8 (7-9)                  | 1.38 (1.26-1.51) |
|                     | ≥80       | 863 (23)                   | 2 (1-3)                  | 1.99 (1.78-2.23) | 912 (20)                            | 2 (1-2)                  | 2.06 (1.86-2.28) |
| Sex                 | Male      | 3098 (82)                  | 12 (11-13)               | 1 (reference)    | 2938 (63)                           | 8 (7-9)                  | 1 (reference)    |
|                     | Female    | 696 (18)                   | 10 (8-12)                | 1.04 (0.95-1.14) | 1693 (37)                           | 11 (9-12)                | 0.83 (0.78-0.89) |
| Comorbidity score   | 0         | 2096 (55)                  | 14 (13-15)               | 1 (reference)    | 2367 (51)                           | 11 (10-13)               | 1 (reference)    |
|                     | 1         | 1115 (29)                  | 11 (9-12)                | 1.11 (1.03-1.20) | 1598 (35)                           | 7 (6-9)                  | 1.15 (1.08-1.23) |
|                     | ≥2        | 583 (15)                   | 6 (4-8)                  | 1.27 (1.15-1.40) | 666 (14)                            | 4 (2-5)                  | 1.45 (1.32-1.59) |
| <b>Surgery</b>      |           |                            |                          |                  |                                     |                          |                  |
| Calendar period     | 1990-1994 | 126 (11)                   | 22 (15-29)               | 2.02 (1.56-2.61) | 346 (31)                            | 20 (15-24)               | 2.03 (1.56-2.63) |
|                     | 1995-1999 | 191 (17)                   | 29 (22-35)               | 1.46 (1.16-1.83) | 275 (25)                            | 25 (20-31)               | 1.62 (1.24-2.13) |
|                     | 2000-2004 | 275 (24)                   | 27 (21-32)               | 1.45 (1.18-1.79) | 183 (16)                            | 25 (18-31)               | 1.53 (1.15-2.04) |
|                     | 2005-2009 | 277 (24)                   | 38 (32-43)               | 1.07 (0.86-1.33) | 193 (17)                            | 29 (23-35)               | 1.41 (1.06-1.88) |
|                     | 2010-2013 | 262 (23)                   | 40 (34-46)               | 1 (reference)    | 119 (11)                            | 39 (30-48)               | 1 (reference)    |
| Age (years)         | <60       | 286 (25)                   | 40 (35-46)               | 1 (reference)    | 317 (28)                            | 25 (20-30)               | 1 (reference)    |
|                     | 60-69     | 423 (37)                   | 31 (26-35)               | 1.25 (1.03-1.51) | 443 (40)                            | 28 (24-32)               | 1.00 (0.85-1.19) |
|                     | 70-79     | 370 (33)                   | 30 (25-34)               | 1.28 (1.05-1.56) | 328 (29)                            | 24 (19-29)               | 1.13 (0.94-1.35) |
|                     | ≥80       | 52 (5)                     | 15 (5-24)                | 1.98 (1.41-2.77) | 28 (3)                              | 11 (-1-22)               | 1.61 (1.07-2.45) |
| Sex                 | Male      | 987 (87)                   | 31 (28-34)               | 1 (reference)    | 729 (65)                            | 21 (18-24)               | 1 (reference)    |
|                     | Female    | 144 (13)                   | 37 (29-45)               | 0.84 (0.68-1.05) | 387 (35)                            | 33 (29-38)               | 0.71 (0.61-0.83) |
| Comorbidity         | 0         | 733 (65)                   | 33 (29-36)               | 1 (reference)    | 698 (63)                            | 27 (24-31)               | 1 (reference)    |
|                     | 1         | 299 (26)                   | 32 (27-38)               | 1.05 (0.89-1.23) | 340 (30)                            | 23(18-27)                | 1.13 (0.97-1.31) |
|                     | ≥2        | 99 (9)                     | 26 (18-36)               | 1.19 (0.93-1.53) | 78 (7)                              | 22 (12-31)               | 1.20 (0.92-1.57) |
| <b>No surgery</b>   |           |                            |                          |                  |                                     |                          |                  |
| Calendar period     | 1990-1994 | 206 (8)                    | 3 (0-5)                  | 1.10 (0.94-1.29) | 802 (23)                            | 2 (1-3)                  | 1.24 (1.11-1.39) |
|                     | 1995-1999 | 366 (14)                   | 1 (0-2)                  | 1.14 (1.00-1.30) | 739 (21)                            | 4 (2-5)                  | 1.15 (1.02-1.28) |
|                     | 2000-2004 | 585 (22)                   | 4 (2-6)                  | 1.02 (0.91-1.13) | 748 (21)                            | 3 (2-5)                  | 1.06 (0.95-1.19) |
|                     | 2005-2009 | 777 (29)                   | 3 (2-5)                  | 1.00 (0.90-1.11) | 668 (19)                            | 4 (3-6)                  | 1.06 (0.95-1.19) |
|                     | 2010-2013 | 729 (27)                   | 3 (2-5)                  | 1 (reference)    | 558 (16)                            | 5 (3-7)                  | 1 (reference)    |
| Age (years)         | <60       | 400 (15)                   | 3 (1-4)                  | 1 (reference)    | 470(13)                             | 7 (5-9)                  | 1 (reference)    |
|                     | 60-69     | 656 (25)                   | 6 (4-7)                  | 0.91 (0.80-1.04) | 901 (26)                            | 4 (3-5)                  | 1.07 (0.95-1.20) |
|                     | 70-79     | 796 (30)                   | 3 (2-4)                  | 1.05 (0.93-1.19) | 1260 (36)                           | 4 (3-5)                  | 1.19 (1.06-1.32) |
|                     | ≥80       | 811 (30)                   | 1 (0-2)                  | 1.21 (1.06-1.37) | 884 (25)                            | 1 (1-2)                  | 1.42 (1.26-1.60) |
| Sex                 | Male      | 2111 (79)                  | 3 (2-4)                  | 1 (reference)    | 2209 (63)                           | 3 (2-4)                  | 1 (reference)    |
|                     | Female    | 552 (21)                   | 3 (1-4)                  | 1.00 (0.90-1.10) | 1306 (37)                           | 4 (3-5)                  | 0.86 (0.81-0.93) |
| Comorbidity score   | 0         | 1363 (51)                  | 4 (3-5)                  | 1 (reference)    | 1669 (47)                           | 5 (4-6)                  | 1 (reference)    |
|                     | 1         | 816 (31)                   | 3 (1-4)                  | 1.04 (0.95-1.14) | 1258 (36)                           | 3 (2-4)                  | 1.07 (0.99-1.15) |
|                     | ≥2        | 484 (18)                   | 2 (0-3)                  | 1.08 (0.97-1.20) | 588 (17)                            | 1 (0-2)                  | 1.30 (1.18-1.43) |

\* Adjusted for calendar period, age, sex and comorbidity.



**Table 3:** Hazard ratios (HR) with 95% confidence intervals (CI) of 5-year mortality after surgery for oesophageal adenocarcinoma and oesophageal squamous-cell carcinoma in 2005-2013, with follow-up until 2017.

| Covariates    | Oesophageal adenocarcinoma |                   |                       | Oesophageal squamous-cell carcinoma |                   |                       |
|---------------|----------------------------|-------------------|-----------------------|-------------------------------------|-------------------|-----------------------|
|               | Patients Number (%)        | Crude HR (95% CI) | Adjusted HR (95% CI)* | Patients Number (%)                 | Crude HR (95% CI) | Adjusted HR (95% CI)* |
| Tumour stage† |                            |                   |                       |                                     |                   |                       |
| 0-I           | 62 (12)                    | 1 (Reference)     | 1 (Reference)         | 34 (11)                             | 1 (Reference)     | 1 (Reference)         |
| II            | 221 (41)                   | 2.53 (1.54-4.14)  | 2.37 (1.44-3.90)      | 143 (46)                            | 2.19 (1.25-3.83)  | 2.20 (1.25-3.87)      |
| III-IV        | 186 (35)                   | 4.14 (2.53-6.76)  | 4.04 (2.46-6.63)      | 98 (31)                             | 2.71 (1.53-4.79)  | 2.64 (1.48-4.71)      |
| Calendar      |                            |                   |                       |                                     |                   |                       |
| 2005-2009     | 277 (51)                   | 1.12 (0.88-1.41)  | 1.04 (0.82-1.32)      | 193 (62)                            | 1.42 (1.05-1.93)  | 1.48 (1.08-2.02)      |
| 2010-2013     | 262 (49)                   | 1 (Reference)     | 1 (Reference)         | 119 (38)                            | 1 (Reference)     | 1 (Reference)         |
| Age (years)   |                            |                   |                       |                                     |                   |                       |
| <60           | 138 (26)                   | 1 (Reference)     | 1 (Reference)         | 79 (25)                             | 1 (Reference)     | 1 (Reference)         |
| 60-69         | 227 (42)                   | 1.52 (1.11-2.08)  | 1.41 (1.02-1.94)      | 137 (44)                            | 0.88 (0.61-1.28)  | 0.81 (0.55-1.18)      |
| 70-79         | 148 (27)                   | 1.52 (1.08-2.14)  | 1.47 (1.03-2.08)      | 86 (28)                             | 1.23 (0.83-1.81)  | 1.21 (0.81-1.81)      |
| ≥80           | 26 (5)                     | 3.39 (2.05-5.60)  | 3.58 (2.14-5.98)      | 10 (3)                              | 1.57 (0.71-3.48)  | 1.58 (0.71-3.53)      |
| Sex           |                            |                   |                       |                                     |                   |                       |
| Male          | 470 (87)                   | 1 (Reference)     | 1 (Reference)         | 210 (67)                            | 1 (Reference)     | 1 (Reference)         |
| Female        | 69 (13)                    | 0.84 (0.59-1.19)  | 0.82 (0.57-1.18)      | 102 (33)                            | 0.67 (0.49-0.93)  | 0.66 (0.47-0.92)      |
| Comorbidity   |                            |                   |                       |                                     |                   |                       |
| 0             | 341 (63)                   | 1 (Reference)     | 1 (Reference)         | 195 (63)                            | 1 (Reference)     | 1 (Reference)         |
| 1             | 144 (27)                   | 1.04 (0.80-1.36)  | 0.95 (0.73-1.25)      | 86 (28)                             | 1.35 (0.98-1.87)  | 1.40 (1.01-1.95)      |
| ≥2            | 54 (10)                    | 1.07 (0.72-1.59)  | 1.02 (0.68-1.52)      | 31 (10)                             | 1.31 (0.82-2.12)  | 1.60 (0.98-2.62)      |

\* Adjusted for calendar period, age, sex, Charlson Comorbidity Index and tumour stage.

† 70 (13%) patients with oesophageal adenocarcinoma and 37 (12%) patients with oesophageal squamous-cell carcinoma had missing tumour stage.



## Figure Legends

**Figure 1.** Kaplan-Meier survival curves showing observed 5-year survival oesophageal adenocarcinoma (A) stratified by surgical treatment (yes or no). Patients undergoing oesophageal resection for adenocarcinoma (B) and not undergoing oesophageal resection for adenocarcinoma (C) are further stratified by calendar periods.

**Figure 2.** Kaplan-Meier survival curves showing observed 5-year survival oesophageal squamous cell carcinoma (A) stratified by surgical treatment (yes or no). Patients undergoing oesophageal resection for squamous cell carcinoma (B) and not undergoing oesophageal resection for squamous cell carcinoma (C) are further stratified by calendar periods.

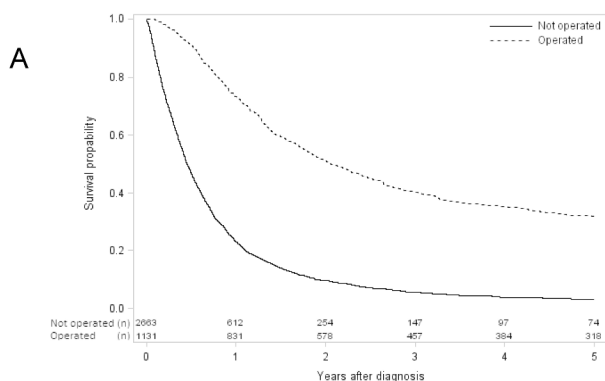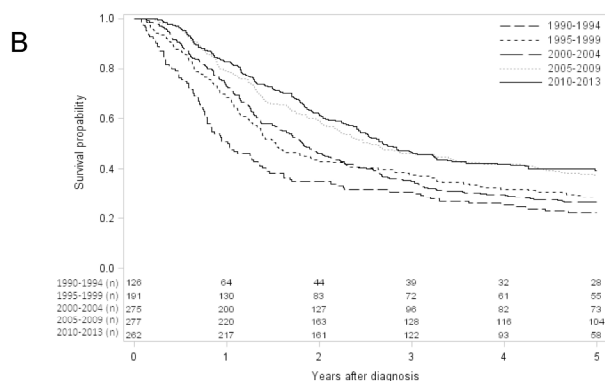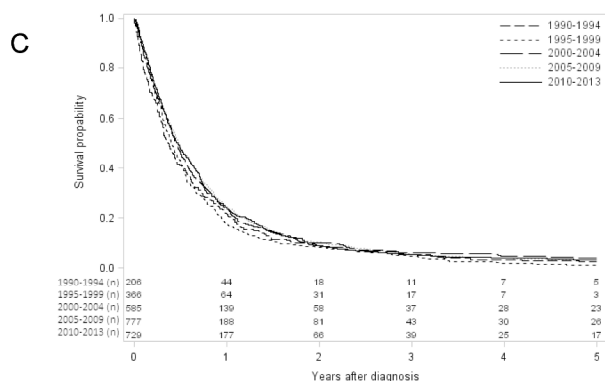

Kaplan-Meier survival curves showing observed 5-year survival oesophageal adenocarcinoma (A) stratified by surgical treatment (yes or no). Patients undergoing oesophageal resection for adenocarcinoma (B) and not undergoing oesophageal resection for adenocarcinoma (C) are further stratified by calendar periods.

275x397mm (300 x 300 DPI)

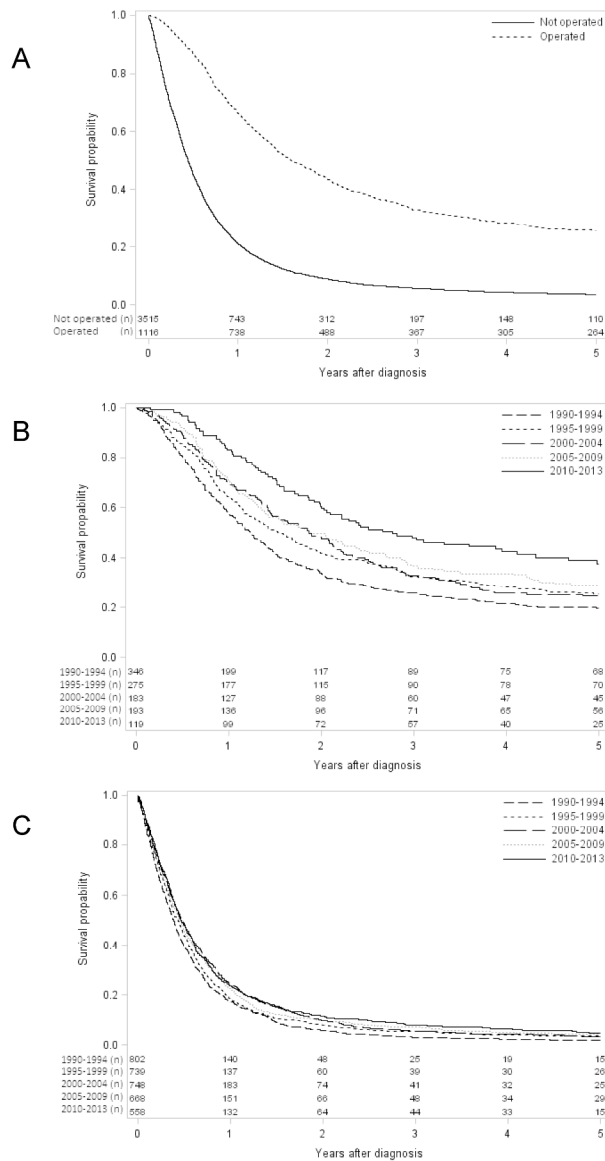

Kaplan-Meier survival curves showing observed 5-year survival oesophageal squamous cell carcinoma (A) stratified by surgical treatment (yes or no). Patients undergoing oesophageal resection for squamous cell carcinoma (B) and not undergoing oesophageal resection for squamous cell carcinoma (C) are further stratified by calendar periods.

275x397mm (300 x 300 DPI)

**STROBE 2007 (v4) Statement—Checklist of items that should be included in reports of *cohort studies***

| Section/Topic                | Item # | Recommendation                                                                                                                                                                       | Reported on page # |
|------------------------------|--------|--------------------------------------------------------------------------------------------------------------------------------------------------------------------------------------|--------------------|
| Title and abstract           | 1      | (a) Indicate the study's design with a commonly used term in the title or the abstract                                                                                               | 1-2                |
|                              |        | (b) Provide in the abstract an informative and balanced summary of what was done and what was found                                                                                  | 2-3                |
| <b>Introduction</b>          |        |                                                                                                                                                                                      |                    |
| Background/rationale         | 2      | Explain the scientific background and rationale for the investigation being reported                                                                                                 | 5                  |
| Objectives                   | 3      | State specific objectives, including any prespecified hypotheses                                                                                                                     | 5                  |
| <b>Methods</b>               |        |                                                                                                                                                                                      |                    |
| Study design                 | 4      | Present key elements of study design early in the paper                                                                                                                              | 6                  |
| Setting                      | 5      | Describe the setting, locations, and relevant dates, including periods of recruitment, exposure, follow-up, and data collection                                                      | 6                  |
| Participants                 | 6      | (a) Give the eligibility criteria, and the sources and methods of selection of participants. Describe methods of follow-up                                                           | 6-7                |
|                              |        | (b) For matched studies, give matching criteria and number of exposed and unexposed                                                                                                  |                    |
| Variables                    | 7      | Clearly define all outcomes, exposures, predictors, potential confounders, and effect modifiers. Give diagnostic criteria, if applicable                                             | 6-8                |
| Data sources/<br>measurement | 8*     | For each variable of interest, give sources of data and details of methods of assessment (measurement). Describe comparability of assessment methods if there is more than one group | 6-8                |
| Bias                         | 9      | Describe any efforts to address potential sources of bias                                                                                                                            | 6                  |
| Study size                   | 10     | Explain how the study size was arrived at                                                                                                                                            | 6                  |
| Quantitative variables       | 11     | Explain how quantitative variables were handled in the analyses. If applicable, describe which groupings were chosen and why                                                         | 8                  |
| Statistical methods          | 12     | (a) Describe all statistical methods, including those used to control for confounding                                                                                                | 7-8                |
|                              |        | (b) Describe any methods used to examine subgroups and interactions                                                                                                                  | 8                  |
|                              |        | (c) Explain how missing data were addressed                                                                                                                                          | 8                  |
|                              |        | (d) If applicable, explain how loss to follow-up was addressed                                                                                                                       | N/A                |
|                              |        | (e) Describe any sensitivity analyses                                                                                                                                                | N/A                |
| <b>Results</b>               |        |                                                                                                                                                                                      |                    |

|                          |     |                                                                                                                                                                                                              |              |
|--------------------------|-----|--------------------------------------------------------------------------------------------------------------------------------------------------------------------------------------------------------------|--------------|
| Participants             | 13* | (a) Report numbers of individuals at each stage of study—eg numbers potentially eligible, examined for eligibility, confirmed eligible, included in the study, completing follow-up, and analysed            | 9            |
|                          |     | (b) Give reasons for non-participation at each stage                                                                                                                                                         | N/A          |
|                          |     | (c) Consider use of a flow diagram                                                                                                                                                                           | N/A          |
| Descriptive data         | 14* | (a) Give characteristics of study participants (eg demographic, clinical, social) and information on exposures and potential confounders                                                                     | 9, 20-22     |
|                          |     | (b) Indicate number of participants with missing data for each variable of interest                                                                                                                          | 21-22        |
|                          |     | (c) Summarise follow-up time (eg, average and total amount)                                                                                                                                                  | N/A          |
| Outcome data             | 15* | Report numbers of outcome events or summary measures over time                                                                                                                                               | 9-13, 20-22  |
| Main results             | 16  | (a) Give unadjusted estimates and, if applicable, confounder-adjusted estimates and their precision (eg, 95% confidence interval). Make clear which confounders were adjusted for and why they were included | 20-22        |
|                          |     | (b) Report category boundaries when continuous variables were categorized                                                                                                                                    | 8, 21-22     |
|                          |     | (c) If relevant, consider translating estimates of relative risk into absolute risk for a meaningful time period                                                                                             | 20           |
| Other analyses           | 17  | Report other analyses done—eg analyses of subgroups and interactions, and sensitivity analyses                                                                                                               | 11-12, 21-22 |
| <b>Discussion</b>        |     |                                                                                                                                                                                                              |              |
| Key results              | 18  | Summarise key results with reference to study objectives                                                                                                                                                     | 14           |
| <b>Limitations</b>       |     |                                                                                                                                                                                                              |              |
| Interpretation           | 20  | Give a cautious overall interpretation of results considering objectives, limitations, multiplicity of analyses, results from similar studies, and other relevant evidence                                   | 14-15        |
| Generalisability         | 21  | Discuss the generalisability (external validity) of the study results                                                                                                                                        | 16           |
| <b>Other information</b> |     |                                                                                                                                                                                                              |              |
| Funding                  | 22  | Give the source of funding and the role of the funders for the present study and, if applicable, for the original study on which the present article is based                                                | 4            |

\*Give information separately for cases and controls in case-control studies and, if applicable, for exposed and unexposed groups in cohort and cross-sectional studies.

**Note:** An Explanation and Elaboration article discusses each checklist item and gives methodological background and published examples of transparent reporting. The STROBE checklist is best used in conjunction with this article (freely available on the Web sites of PLoS Medicine at <http://www.plosmedicine.org/>, Annals of Internal Medicine at <http://www.annals.org/>, and Epidemiology at <http://www.epidem.com/>). Information on the STROBE Initiative is available at [www.strobe-statement.org](http://www.strobe-statement.org).

# BMJ Open

## Prognosis of oesophageal adenocarcinoma and squamous cell carcinoma following surgery and no surgery in a nationwide Swedish cohort study

|                                 |                                                                                                                                                                                                                                                                                                                                                                                                                                                                                                                                                                                                                   |
|---------------------------------|-------------------------------------------------------------------------------------------------------------------------------------------------------------------------------------------------------------------------------------------------------------------------------------------------------------------------------------------------------------------------------------------------------------------------------------------------------------------------------------------------------------------------------------------------------------------------------------------------------------------|
| Journal:                        | <i>BMJ Open</i>                                                                                                                                                                                                                                                                                                                                                                                                                                                                                                                                                                                                   |
| Manuscript ID                   | bmjopen-2018-021495.R1                                                                                                                                                                                                                                                                                                                                                                                                                                                                                                                                                                                            |
| Article Type:                   | Research                                                                                                                                                                                                                                                                                                                                                                                                                                                                                                                                                                                                          |
| Date Submitted by the Author:   | 08-Mar-2018                                                                                                                                                                                                                                                                                                                                                                                                                                                                                                                                                                                                       |
| Complete List of Authors:       | Kauppila, Joonas; Karolinska Institutet Department of Molecular Medicine and Surgery, ; Oulun Yliopisto Laaketieteellisen tiedekunta, Cancer and Translational Medicine Research Unit<br>Mattsson, Fredrik; Karolinska Institutet, Upper Gastrointestinal Research, Department of Molecular Medicine and Surgery<br>Brusselaers, Nele; Karolinska Institutet, Centre for Translational Microbiome Research, Department of Microbiology, Tumor and Cell Biology (MTC)<br>Lagergren, Jesper; Karolinska Institutet, Department of Molecular medicine and Surgery; King's College London, Division of Cancer Studies |
| <b>Primary Subject Heading</b>: | Epidemiology                                                                                                                                                                                                                                                                                                                                                                                                                                                                                                                                                                                                      |
| Secondary Subject Heading:      | Gastroenterology and hepatology, Health services research, Surgery, Oncology                                                                                                                                                                                                                                                                                                                                                                                                                                                                                                                                      |
| Keywords:                       | Gastrointestinal tumours < GASTROENTEROLOGY, Oesophageal disease < GASTROENTEROLOGY, Epidemiology < ONCOLOGY, Gastrointestinal tumours < ONCOLOGY, Thoracic surgery < SURGERY, EPIDEMIOLOGY                                                                                                                                                                                                                                                                                                                                                                                                                       |
|                                 |                                                                                                                                                                                                                                                                                                                                                                                                                                                                                                                                                                                                                   |

SCHOLARONE™  
Manuscripts

1  
2  
3 **Prognosis of oesophageal adenocarcinoma and squamous cell carcinoma following**  
4 **surgery and no surgery in a nationwide Swedish cohort study**  
5

6  
7 **Authors:** Joonas H Kauppila, MD, PhD<sup>1,2</sup>, Fredrik Mattsson, MSc<sup>1</sup>, Nele Brusselaers, MD,  
8 PhD, MSc<sup>3</sup> and Jesper Lagergren, MD, PhD<sup>1,4</sup>.  
9

10  
11 **Affiliations:** <sup>1</sup>Upper Gastrointestinal Surgery, Department of Molecular medicine and  
12 Surgery, Karolinska Institutet, Karolinska University Hospital, 17176 Stockholm, Sweden,  
13 <sup>2</sup>Cancer and Translational Medicine Research Unit, Medical Research Center Oulu,  
14 University of Oulu, Oulu University Hospital, PO Box 5000, 90014, Oulu, Finland, <sup>3</sup>Centre  
15 for Translational Microbiome Research, Department of Microbiology, Tumor and Cell  
16 Biology (MTC), Karolinska Institutet, 17177 Stockholm, Sweden, <sup>4</sup>School of Cancer  
17 Sciences, King's College London and Guy's and St Thomas' NHS Foundation Trust, London  
18 SE1 9RT, England.  
19  
20  
21  
22  
23  
24  
25  
26  
27  
28  
29  
30

31 **Corresponding author:** Joonas H Kauppila, Upper Gastrointestinal Surgery, Department of  
32 Molecular Medicine and Surgery, Karolinska Institutet, Karolinska University Hospital,  
33 17176 Stockholm, Sweden Email: [joonas.kauppila@ki.se](mailto:joonas.kauppila@ki.se), Fax: +46 8-517 762 80  
34  
35  
36  
37  
38  
39  
40  
41  
42  
43  
44  
45  
46  
47  
48  
49  
50  
51  
52  
53  
54  
55  
56  
57  
58  
59  
60

## Abstract

**Objectives:** To assess the recent prognostic trends in oesophageal adenocarcinoma and oesophageal squamous cell carcinoma undergoing resectional surgery and no such surgery. Additionally, risk factors for death were assessed in each of these patient groups.

**Design:** Cohort study

**Setting:** A population-based, nationwide study in Sweden.

**Participants:** All patients diagnosed with oesophageal adenocarcinoma and oesophageal squamous cell carcinoma in Sweden from January 1, 1990 to December 31, 2013, with follow up until May 14, 2017.

**Outcome measures:** Observed and relative (to the background population) 1-, 3- and 5 year survival were analysed using life table method. Multivariable Cox regression provided hazard ratios (HR) with 95% confidence intervals (95%CI) for risk factors of death.

**Results:** Among 3794 patients with oesophageal adenocarcinoma and 4631 with oesophageal squamous cell carcinoma, 82% and 63% were men, respectively. From 1990-1994 to 2010-2013, the relative 5-year survival increased from 12% to 15% for oesophageal adenocarcinoma and from 9% to 12% for oesophageal squamous cell carcinoma. The corresponding survival following surgery increased from 27% to 45% in oesophageal adenocarcinoma and from 24% to 43% in oesophageal squamous cell carcinoma. In patients not undergoing surgery, the survival increased from 3% to 4% for oesophageal adenocarcinoma and from 3% to 6% for oesophageal squamous cell carcinoma. Women with oesophageal squamous cell carcinoma had better prognosis than men both following surgery (HR 0.71, 95%CI 0.61-0.83) and no surgery (HR 0.86, 95%CI 0.81-0.93).



1  
2  
3 **Conclusions:** The prognosis has improved over calendar time both in oesophageal  
4 adenocarcinoma and oesophageal squamous-cell carcinoma in Sweden that did and did not  
5 undergo surgery. Women appear to have better prognosis in oesophageal squamous-cell  
6 carcinoma than men, independent of treatment.  
7  
8  
9  
10

11  
12  
13  
14  
15 **Strengths and limitations of this study:**  
16

- 17  
18 - The main strength of the study is the population-based design with complete and accurate  
19 ascertainment and follow-up of all patients diagnosed with oesophageal cancer in Sweden.  
20  
21 - Valid estimation of disease-specific mortality was possible with highly accurate information  
22 on oesophageal cancer histology, surgical treatment, and date of death and the calculation of  
23 relative survival rates.  
24  
25 - The sample size was large enough to enable robust analyses of time trends in sub-groups of  
26 patients, and to assess risk factors of mortality.  
27  
28 - Limitations include the unavailability some clinical variables, such as neoadjuvant or  
29 adjuvant treatment.  
30  
31 - Tumor stage variable was unavailable before 2004, and complete for only surgically treated  
32 patients after 2004.  
33  
34  
35  
36  
37  
38  
39  
40  
41  
42  
43  
44

45 **Funding statement:** This work was supported by the Swedish Research Council  
46 (Vetenskapsrådet) (J.L), the Swedish Cancer Society (Cancerfonden) (J.L.), Sigrid Jusélius  
47 Foundation (Sigrid Juséliuksen Säätiö) (J.H.K.) and Orion Research Foundation (Orionin  
48 Tutkimussäätiö) (J.H.K.). The funding sources had no role in the design and conduct of the  
49 study; collection, management, analysis, and interpretation of the data; preparation, review, or  
50 approval of the manuscript; or decision to submit the manuscript for publication.  
51  
52  
53  
54  
55  
56  
57  
58  
59  
60

1  
2  
3  
4  
5  
6 **Competing interests statement:** The authors state no potential competing interests.  
7  
8  
9

10 **Contributors:**

11  
12 The authors' contributions in the study were the following: The design of the study: JHK,  
13 FM, NB, JL; Data collection and preparation for analyses: FM and JL; Data analysis: FM;  
14  
15 Data interpretation: JHK, FM, NB, JL; Writing of first draft: JHK, revised and approved by  
16  
17 JHK, FM, NB, JL.  
18  
19  
20  
21  
22  
23

24 **Data sharing statement:**

25  
26 We are willing to share data upon request after ethical approval has been approved by the  
27  
28 relevant committee and the governmental agencies that maintain the data.  
29  
30  
31  
32  
33  
34  
35  
36  
37  
38  
39  
40  
41  
42  
43  
44  
45  
46  
47  
48  
49  
50  
51  
52  
53  
54  
55  
56  
57  
58  
59  
60

## Introduction

Oesophageal cancer is the 6<sup>th</sup> most common cause of cancer death worldwide.<sup>1</sup> The overall survival is poor; only 10-22% of patients survive 5 years after diagnosis in Europe, the United States, and China.<sup>2-4</sup> Most studies have reported survival for oesophageal cancer in general, but despite that oesophageal adenocarcinoma and squamous-cell carcinoma are increasingly seen as separate diseases with different aetiologies, incidence trends, and treatments.<sup>5-9</sup>

In the United States the 5-year overall survival in oesophageal cancer patients has increased from 18% in the 1990s to 22% in the 2000s,<sup>10</sup> whereas in Europe the survival has increased from 10% in 1999-2001 to 13% in 2005-2007.<sup>11</sup> The surgical technique, neoadjuvant modalities and definitive chemoradiation therapies have seen much development over the last two decades.<sup>6 7 12</sup> It has been acknowledged that surgeon and hospital volume are related to survival in oesophageal cancer, resulting in centralisation of oesophageal cancer treatment.<sup>13-15</sup> However, it is not known whether and how survival in oesophageal adenocarcinoma or squamous-cell carcinoma have changed during the last few years, and even more unclear is how this might have changed specifically in patients undergoing surgery and patients not undergoing surgery. Sweden provides an excellent setting to answer these questions, because of its accurate and complete nationwide registries.<sup>16 17</sup>

This nationwide Swedish study was conducted with the aim of assessing survival in oesophageal adenocarcinoma and squamous-cell carcinoma separately, and also specifically in patients undergoing resectional surgery (oesophagectomy) and those that do not undergo such surgery. Additionally, risk factors for death were assessed in each of these patient groups.

## Methods

### Design

This was a nationwide Swedish population-based cohort study, including all patients diagnosed with oesophageal adenocarcinoma or squamous-cell carcinoma from January 1, 1990, through December 31, 2013, with follow-up for survival until May 14, 2017. All newly diagnosed patients were identified from the Swedish Cancer Registry, while information about surgery was retrieved from the Swedish Patient Registry, and mortality from the Swedish Causes of Death Registry. The reporting to these registries is required according to Swedish law. Patient data was linked by the unique personal identity numbers assigned to each resident in Sweden, which are ideal for registry-based research.<sup>16</sup> The study was approved by the Regional Ethical Review Board in Stockholm, Sweden (2015/1916-31/1).

### Data collection

*The Swedish Cancer Registry* was used to identify the study patients. The nationwide completeness for recording of oesophageal cancer was 98% and the histological confirmation was 100%.<sup>17</sup> The diagnosis codes 150.0, 150.8, and 150.9 in the 7<sup>th</sup> version of the International Classification of Diseases (ICD-7) were used to identify patients with oesophageal cancer. The histology codes (WHO/HS/CANC/24.1 Histology Code) were used to separate patients with oesophageal adenocarcinoma (096) and squamous cell carcinoma (146). Tumour stage has been recorded in the Swedish Cancer Registry from June 2004 onwards. The tumour stage variable is >98% concordant with patient records for operated oesophageal cancer patients.<sup>18</sup> The tumour stage classification in the registry was completed according to the 6<sup>th</sup> edition of the Union Internationale Contre le Cancer.<sup>19</sup>

1  
2  
3 *The Swedish Patient Registry* was used to identify all patients who underwent resectional  
4 surgery and also to assess comorbidities at the time of diagnosis.<sup>20</sup> The Swedish Classification  
5 of Operations and Major Procedures was used to identify the relevant operation codes  
6 (oesophagectomy codes 2820-2829 in 1990-1997 and codes JCC00-JCC97 in 1997-2014 and  
7 oesophagogastrectomy and gastrectomy codes 4411-4435 in 1990-1997 and codes JDC00-  
8 JDD96 in 1997-2014). Except for oesophagectomy codes, gastrectomy codes were included,  
9 because some surgeons tend to combine oesophagectomy with gastrectomy in locally  
10 advanced cancer. Operation codes referring to oesophagogastrectomy or gastrectomy were  
11 found in a total of 78 (0.9%) patients. The positive predictive value for oesophageal cancer  
12 resection has been estimated at 99.6% in the Swedish Patient Registry.<sup>21</sup>

13  
14  
15  
16  
17  
18  
19  
20  
21  
22  
23  
24  
25  
26 Comorbidities were defined according to the well-validated Charlson Comorbidity Index,<sup>22</sup>  
27 not including the oesophageal cancer or metastatic solid tumours. The comorbidity  
28 information was retrieved from hospital admissions in the Patient Registry, which is at least  
29 95% complete for most comorbidities,<sup>23</sup> up to three years before the index admission or  
30 cancer diagnosis

31  
32  
33  
34  
35  
36  
37  
38  
39 *The Swedish Causes of Death Registry* was used to obtain mortality. This registry contains  
40 100% complete information on date of death for all deceased Swedish residents from 1952  
41 onwards.<sup>24</sup>

### 42 43 44 45 46 47 48 **Statistical analysis**

49  
50 An experienced biostatistician (F.M.) conducted all data management and statistical analysis  
51 according to a detailed and pre-defined study protocol. All analyses were conducted using  
52 SAS (version 9.4, SAS Institute Inc., Cary, NC). Observed and relative survival was  
53  
54  
55  
56  
57  
58  
59  
60

1  
2  
3 presented for survival at 1 and 5 years following a diagnosis date of oesophageal  
4  
5 adenocarcinoma or squamous cell carcinoma. Observed survival with 95% confidence  
6  
7 intervals (CI) was estimated using the life-table method,<sup>25</sup> where the event was defined as  
8  
9 death by any cause (all-cause mortality).  
10

11  
12 To assess disease-specific mortality, relative survival with 95% CIs was calculated as the ratio  
13  
14 of observed to the expected survival. The expected survival was derived from the survival in  
15  
16 the general Swedish population of the same age (per year), sex, and calendar year as the  
17  
18 patients with oesophageal cancer. Both observed and relative survival was presented as  
19  
20 percentages (%). The survival in the general Swedish population was available from the start  
21  
22 of the study period until the end of 2015, and for the calculation of relative survival rates for  
23  
24 the years 2016 and 2017 the mortality rates from 2015 were used. The results were analysed  
25  
26 for all patients independent of treatment and also stratified by resectional surgery (yes or no).  
27  
28

29  
30 The observed survival was stratified by calendar periods (year 1990-1994, 1995-1999, 2000-  
31  
32 2004, 2005-2009, or 2010-2013), age (<60, 60-69, 70-79, or  $\geq 80$  years), sex (male or female),  
33  
34 and Charlson Comorbidity Index<sup>22</sup> score (0, 1, or  $\geq 2$ ). Surgically treated patients were further  
35  
36 stratified for tumour stage (0-I, II, or III-IV) from the year 2005 onwards, when tumour stage  
37  
38 data were available and of high completeness. Cox regression was used to calculate crude and  
39  
40 adjusted hazard ratios (HR) with 95% CIs for each of the aforementioned stratification  
41  
42 variables (calendar period, age, sex, Charlson Comorbidity Index score and tumour stage)  
43  
44 with the same categorisation. The estimates were mutually adjusted for the risk factors where  
45  
46 indicated. The missing data for tumour stage were assumed to be missing at random and were  
47  
48 dealt with using complete case analysis.  
49  
50  
51  
52  
53  
54

## 55 **Patient and Public Involvement**

56  
57  
58  
59  
60

1  
2  
3  
4  
5  
6  
7  
8  
9  
10  
11  
12  
13  
14  
15  
16  
17  
18  
19  
20  
21  
22  
23  
24  
25  
26  
27  
28  
29  
30  
31  
32  
33  
34  
35  
36  
37  
38  
39  
40  
41  
42  
43  
44  
45  
46  
47  
48  
49  
50  
51  
52  
53  
54  
55  
56  
57  
58  
59  
60

Patients or public were not involved in the development of the research question and study design or conducting the present study.

For peer review only

## Results

### Patients

A total of 3794 patients were diagnosed with oesophageal adenocarcinoma during the study period, including 1131 (30%) who had undergone oesophagectomy. Among all 4631 patients diagnosed with oesophageal squamous cell carcinoma, 1116 (24%) had undergone oesophagectomy. Men were overrepresented in both oesophageal adenocarcinoma group (82%), and squamous cell carcinoma group (63%). The number of oesophageal adenocarcinoma patients increased throughout the study period, while the number of oesophageal squamous cell carcinoma patients decreased (Table 1). The proportion of adenocarcinoma patients who underwent oesophagectomy decreased from 38% in 1990-1994 to 27% in 2010-2013, and for squamous-cell carcinoma patients this proportion decreased from 31% in 1990-1994 to 18% in 2010-2013 (Table 1).

### Survival trends in oesophageal adenocarcinoma

Because the observed survival closely mirrored the relative survival (Table 1), only the results regarding relative survival are commented on here.

#### *All patients*

The relative survival in oesophageal adenocarcinoma improved during the study period; the 1-year survival increased from 35% in 1990-1994 to 41% in 2010-2013 (with follow-up to 2017), and the corresponding 5-year survival gradually increased from 12% to 15%. (Table 1). From the year 2000 onwards, the relative 5-year survival increased by 2% (Table 1).

#### *Surgically treated patients*



1  
2  
3 The relative survival increased substantially in surgically treated patients. In the  
4  
5 oesophagectomy group, the 1-year survival increased from 54% in 1990-1994 to 86% in  
6  
7 2010-2013 (with follow-up until 2017), and the corresponding 5-year survival increased from  
8  
9 27% to 45% (Table 1, Figure 1). From the year 2000 onwards, the relative 1-year survival  
10  
11 increased by 11% and the 5-year survival by 12% (Table 1).  
12  
13

#### 14 15 16 *Patients not undergoing surgery*

17  
18 In the patients not undergoing surgery, the 1-year survival increased from 24% in 1990-1994  
19  
20 to 25% in 2010-2013 (with follow-up to 2017), and the corresponding 5-year survival  
21  
22 increased from 3% to 4% (Table 1, Figure 1). From 2000 onwards the 1- and 5-year survival  
23  
24 estimates were stable (Table 1).  
25  
26  
27

### 28 29 **Survival trends in oesophageal squamous-cell carcinoma**

#### 30 31 *All patients*

32  
33 Also the relative survival in oesophageal squamous cell carcinoma improved over time. The  
34  
35 relative 1-year survival increased from 32% in 1990-1994 to 36% in 2010-2013 (with follow-  
36  
37 up until 2017), and the corresponding 5-year survival increased from 9% to 12% (Table 1).  
38  
39 From the year 2000 onwards the relative 1-year survival increased by 1%, and the 5-year  
40  
41 survival increased by 3% (Table 1).  
42  
43  
44  
45

#### 46 47 *Surgically treated patients*

48  
49 The 1-year relative survival of surgically treated patients increased from 60% in 1990-1994 to  
50  
51 87% in 2010-2013 (with follow-up until 2017), and the corresponding 5-year survival  
52  
53 increased from 24% to 43% (Table 1, Figure 2). From the year 2000 onwards both 1- and 5-  
54  
55 year survival increased by 14% (Table 1).  
56  
57  
58  
59  
60

### *Patients not undergoing surgery*

The relative 1-year survival in patients not undergoing surgery was 20% in 1990-1994 and 25% in 2010-2013 (with follow-up until 2017), and the corresponding 5-year survival doubled from 3% to 6% (Table 1, Figure 2). From the year 2000 onwards both 1-and 5-year survival increased by 2% (Table 1).

### **Risk factors for 5-year mortality in oesophageal adenocarcinoma**

#### *All patients*

In the multivariable analysis of all oesophageal adenocarcinoma patients, the adjusted HR of mortality within 5 years of diagnosis was higher in earlier calendar periods (HR 1.17, 95%CI 1.02-1.33, first versus last calendar period), older age groups (HR 1.99, 95%CI 1.78-2.22, age  $\geq 80$  years versus  $< 60$  years), and in patients with more comorbidity (HR 1.27, 95%CI 1.15-1.40,  $\geq 2$  comorbidities versus no comorbidities), while sex did not influence the HR of mortality (Table 2).

#### *Surgically treated patients*

Among the oesophageal adenocarcinoma patients who underwent oesophagectomy, earlier calendar period (HR 2.02, 95%CI 1.56-2.61, first versus last calendar period) and older age (HR 1.98, 95%CI 1.41-2.77, age  $\geq 80$  years versus  $< 60$  years) were associated with an increased risk of mortality, while comorbidity and sex did not statistically significantly influence this risk (Table 2).

In a sub-analysis of patients diagnosed between 2005 and 2013, i.e. when tumour stage data were available and adjusted for, higher tumour stage and older age were statistically significant poor prognostic factors (Table 3).

1  
2  
3  
4  
5 *Patients not undergoing surgery*

6  
7 Among the oesophageal adenocarcinoma patients not undergoing surgery, older age (HR  
8 1.21, 95%CI 1.06-1.37, age  $\geq$ 80 years versus  $<$ 60 years) was the only factor associated with  
9 an increased risk of mortality (Table 2).  
10  
11  
12

13  
14  
15 **Risk factors for 5-year mortality in oesophageal squamous-cell carcinoma**

16  
17 *All patients*

18  
19 The multivariable analysis in all oesophageal squamous cell carcinoma patients showed that  
20 risk factors for 5-year mortality were earlier calendar period (HR 1.19, 95%CI 1.07-1.31, first  
21 versus last calendar period), older age (HR 2.06, 95%CI 1.86-2.28, age  $\geq$ 80 years versus  $<$ 60  
22 years), male sex (HR 0.83, 95%CI 0.78-0.89, women versus men), and comorbidity (HR 1.45,  
23 95%CI 1.32-1.59,  $\geq$ 2 comorbidities versus no comorbidities) (Table 2).  
24  
25  
26  
27  
28  
29  
30  
31  
32  
33

34  
35 *Surgically treated patients*

36  
37 Among the oesophageal squamous cell carcinoma patients who underwent oesophagectomy,  
38 earlier calendar period (HR 2.03, 95%CI 1.56-2.63, first versus last calendar period), older  
39 age (HR 2.06, 95%CI 1.86-2.28, age  $\geq$ 80 years versus  $<$ 60 years), and male sex (HR 0.71,  
40 95%CI 0.61-0.83, women versus men) were associated with an increased risk of mortality,  
41 while comorbidity did not statistically significantly influence this risk (Table 2). In a sub-  
42 analysis of patients diagnosed between 2005 to 2013, i.e. when tumour stage data were  
43 available and adjusted for, more advanced tumour stage, earlier calendar period, older age,  
44 male sex, and more comorbidity were poor prognostic factors in oesophageal squamous cell  
45 carcinoma (Table 3).  
46  
47  
48  
49  
50  
51  
52  
53  
54  
55  
56  
57  
58  
59  
60

1  
2  
3 *Patients not undergoing surgery*

4  
5 Among the oesophageal squamous cell carcinoma patients not undergoing surgery, earlier  
6  
7 calendar period (HR 1.24, 95%CI 1.11-1.39, first versus last calendar period), older age (HR  
8  
9 1.42, 95%CI 1.26-1.60, age  $\geq 80$  years versus  $< 60$  years), male sex (HR 0.86, 95%CI 0.81-  
10  
11 0.93, women versus men), and comorbidity (HR 1.30, 95%CI 1.18-1.43,  $\geq 2$  comorbidities  
12  
13 versus no comorbidities) were associated with an increased risk of mortality (Table 2).  
14  
15  
16  
17  
18  
19  
20  
21  
22  
23  
24  
25  
26  
27  
28  
29  
30  
31  
32  
33  
34  
35  
36  
37  
38  
39  
40  
41  
42  
43  
44  
45  
46  
47  
48  
49  
50  
51  
52  
53  
54  
55  
56  
57  
58  
59  
60

## Discussion

This study indicates that the overall prognosis of both oesophageal adenocarcinoma and oesophageal squamous cell carcinoma is improving over time, especially in the groups of patients that underwent surgery. Female patients with oesophageal squamous cell carcinoma had better prognosis than male patients.

Among strengths of the study is the population-based design with complete and accurate ascertainment and follow-up of all patients diagnosed with oesophageal cancer in Sweden. The assessment of the oesophageal cancer histology, surgical treatment, and date of death was highly accurate and the calculation of relative survival rates allowed valid estimation of disease-specific mortality. The sample size was large enough to enable robust analyses of time trends in sub-groups of patients, and to assess risk factors of mortality. Limitations include the unavailability of some clinical variables, such as use of neoadjuvant or adjuvant treatment. In patients not undergoing surgery it was not possible to assess the treatment modalities used, which adds clinical heterogeneity to this group of patients. Tumour stage data were available only after 2004 and complete only in patients who had undergone surgery. However, the main purpose of the study was to evaluate time trends in survival and to separate these trends into patients who had undergone surgery or not, which was fully possible to achieve.

Previously, a registry-based study from United States showed an increase in 5-year overall survival in oesophageal cancer patients from 18% in 1990s to 22% in 2000s.<sup>10</sup> A European registry-based study (EUROCARE-5) also showed improvement in 5-year overall age-standardised survival rates in oesophageal cancer from 10% in 1999-2001 to 13% in 2005-2007.<sup>11</sup> In China, the age-standardised 5-year relative survival rate for oesophageal cancer

1  
2  
3 was 21% in 2003-2005.<sup>26</sup> Taken together, earlier studies have shown improving prognosis in  
4  
5 oesophageal cancer over time. However, they reported only on earlier calendar periods, and  
6  
7 information on histology- or treatment-specific survival were lacking.  
8  
9

10  
11 The findings of increasing survival over time in both oesophageal adenocarcinoma and  
12  
13 oesophageal squamous cell carcinoma despite a decreasing utilisation of oesophagectomy are  
14  
15 encouraging. Increased awareness and diagnostic developments might explain the improved  
16  
17 prognosis. The treatment might have been improved by centralisation of surgery,<sup>14 15</sup> use of  
18  
19 neoadjuvant chemoradiotherapy<sup>27 28</sup> or definitive chemoradiotherapy.<sup>29</sup> The more clearly  
20  
21 improved 5-year survival in patients with non-surgically managed oesophageal squamous cell  
22  
23 carcinoma patients might be due to a higher sensitivity to chemoradiotherapy in oesophageal  
24  
25 squamous cell carcinoma, resulting in a higher success rate of definite oncological therapy.<sup>30</sup>  
26  
27  
28  
29 <sup>31</sup> Additionally, careful selection of treatment for the elderly, co-morbid and frail patients by  
30  
31 the multidisciplinary teams, preoperative optimisation of patients and improved peri- and  
32  
33 postoperative care are likely reasons for improved survival in the patients undergoing surgery.  
34  
35

36  
37 The better prognosis in women with oesophageal squamous cell carcinoma was unexpected.  
38  
39 However, some earlier population-based studies have associated female sex with favourable  
40  
41 prognosis in oesophageal cancer,<sup>32-34</sup> although these studies did not separate the histological  
42  
43 subtypes, tumour stage, or treatment strategies.<sup>35</sup> In the present study, female sex was a strong  
44  
45 positive predictor of survival in both surgically and non-surgically treated patients with  
46  
47 oesophageal squamous cell carcinoma, also after adjustment. A possible biological  
48  
49 mechanism for a sex difference is estrogenic influence, which could inhibit cancer cell  
50  
51 growth.<sup>36-38</sup> Additionally, hormone replacement therapy associates to lower risk of  
52  
53 oesophageal squamous cell carcinoma.<sup>39 40</sup> Healthcare-seeking patterns might also differ  
54  
55  
56  
57  
58  
59  
60

1  
2  
3 between the sexes, with women more readily and more often utilizing health resources  
4 available to them, compared to men.<sup>41 42</sup> It is however unclear why these patterns would differ  
5  
6 between oesophageal adenocarcinoma and squamous cell carcinoma patients, or squamous  
7 cell carcinoma patients undergoing surgery and not undergoing surgery. The sex differences  
8  
9 in survival after oesophageal squamous cell carcinoma might also be due to differences in  
10  
11 socioeconomic and lifestyle factors, which could not be adjusted for in the present study, and  
12  
13 should be specifically examined in future studies.  
14  
15  
16  
17  
18  
19

20 The treatment of oesophageal cancer in the Swedish publicly funded healthcare system  
21 follows clinical guidelines, including routine neoadjuvant therapy and centralisation to fewer  
22 hospitals during the last years. Thus, the findings of the present study should be generalisable  
23  
24 to many other countries with a similar healthcare system as in Sweden. These findings suggest  
25  
26 that the recent changes in the Swedish healthcare system, i.e. careful selection of patients  
27  
28 undergoing surgery, multidisciplinary management, centralisation of services, and use of  
29  
30 neoadjuvant treatment in surgical candidates, and definitive chemoradiotherapy in patients  
31  
32 ineligible for surgery, might result in improved prognosis of oesophageal cancer patients.  
33  
34  
35  
36  
37  
38

39 In conclusion, this nationwide Swedish study with complete ascertainment and follow-up of  
40 patients with oesophageal cancer shows that the prognosis in both oesophageal  
41  
42 adenocarcinoma and oesophageal squamous cell carcinoma is improving. The improved  
43  
44 prognosis is stronger in surgically managed patients, but is also indicated in non-operated  
45  
46 patients. Non-operated patients still have a poor prognosis. The favourable prognosis in  
47  
48 women with oesophageal squamous cell carcinoma warrants further research.  
49  
50  
51  
52  
53  
54  
55  
56  
57  
58  
59  
60

## References

1. Global Burden of Disease Cancer C, Fitzmaurice C, Allen C, et al. Global, Regional, and National Cancer Incidence, Mortality, Years of Life Lost, Years Lived With Disability, and Disability-Adjusted Life-years for 32 Cancer Groups, 1990 to 2015: A Systematic Analysis for the Global Burden of Disease Study. *JAMA Oncol* 2017;3(4):524-48. doi: 10.1001/jamaoncol.2016.5688 [published Online First: 2016/12/06]
2. Gavin AT, Francisci S, Foschi R, et al. Oesophageal cancer survival in Europe: a EURO-CARE-4 study. *Cancer Epidemiol* 2012;36(6):505-12. doi: 10.1016/j.canep.2012.07.009
3. Dubecz A, Gall I, Solymosi N, et al. Temporal trends in long-term survival and cure rates in esophageal cancer: a SEER database analysis. *J Thorac Oncol* 2012;7(2):443-7. doi: 10.1097/JTO.0b013e3182397751
4. Lagergren J, Mattsson F. Diverging trends in recent population-based survival rates in oesophageal and gastric cancer. *PLoS One* 2012;7(7):e41352. doi: 10.1371/journal.pone.0041352
5. Napier KJ, Scheerer M, Misra S. Esophageal cancer: A Review of epidemiology, pathogenesis, staging workup and treatment modalities. *World J Gastrointest Oncol* 2014;6(5):112-20. doi: 10.4251/wjgo.v6.i5.112
6. Lagergren J, Smyth E, Cunningham D, et al. Oesophageal cancer. *Lancet* 2017 doi: 10.1016/S0140-6736(17)31462-9
7. Lagergren J, Lagergren P. Recent developments in esophageal adenocarcinoma. *CA Cancer J Clin* 2013;63(4):232-48. doi: 10.3322/caac.21185



- 1  
2  
3 8. Brown LM, Hoover RN, Greenberg RS, et al. Are racial differences in squamous cell  
4 esophageal cancer explained by alcohol and tobacco use? *J Natl Cancer Inst*  
5 1994;86(17):1340-5.  
6  
7  
8  
9 9. Gupta B, Kumar N. Worldwide incidence, mortality and time trends for cancer of the  
10 oesophagus. *Eur J Cancer Prev* 2017;26(2):107-18. doi: 10.1097/CEJ.0000000000000249  
11  
12  
13 10. Njei B, McCarty TR, Birk JW. Trends in esophageal cancer survival in United States  
14 adults from 1973 to 2009: A SEER database analysis. *J Gastroenterol Hepatol*  
15 2016;31(6):1141-6. doi: 10.1111/jgh.13289  
16  
17  
18  
19 11. Anderson LA, Tavilla A, Brenner H, et al. Survival for oesophageal, stomach and small  
20 intestine cancers in Europe 1999-2007: results from EUROCARE-5. *Eur J Cancer* 2015 doi:  
21 10.1016/j.ejca.2015.07.026  
22  
23  
24  
25 12. Kauppila JH, Helminen O, Kyto V, et al. Short-Term Outcomes Following Minimally  
26 Invasive and Open Esophagectomy: A Population-Based Study from Finland and Sweden.  
27 *Ann Surg Oncol* 2018;25(1):326-32. doi: 10.1245/s10434-017-6212-9 [published Online First:  
28 2017/11/03]  
29  
30  
31  
32  
33 13. Markar SR, Mackenzie H, Lagergren P, et al. Surgical Proficiency Gain and Survival  
34 After Esophagectomy for Cancer. *J Clin Oncol* 2016;34(13):1528-36. doi:  
35 10.1200/JCO.2015.65.2875 [published Online First: 2016/03/10]  
36  
37  
38  
39  
40 14. Brusselaers N, Mattsson F, Lagergren J. Hospital and surgeon volume in relation to long-  
41 term survival after oesophagectomy: systematic review and meta-analysis. *Gut*  
42 2014;63(9):1393-400. doi: 10.1136/gutjnl-2013-306074 [published Online First: 2013/11/26]  
43  
44  
45  
46 15. Derogar M, Sadr-Azodi O, Johar A, et al. Hospital and surgeon volume in relation to  
47 survival after esophageal cancer surgery in a population-based study. *J Clin Oncol*  
48 2013;31(5):551-7. doi: 10.1200/JCO.2012.46.1517  
49  
50  
51  
52  
53  
54  
55  
56  
57  
58  
59  
60

- 1  
2  
3 16. Ludvigsson JF, Otterblad-Olausson P, Pettersson BU, et al. The Swedish personal identity  
4 number: possibilities and pitfalls in healthcare and medical research. *Eur J Epidemiol*  
5 2009;24(11):659-67. doi: 10.1007/s10654-009-9350-y  
6  
7  
8  
9 17. Lindblad M, Ye W, Lindgren A, et al. Disparities in the classification of esophageal and  
10 cardia adenocarcinomas and their influence on reported incidence rates. *Ann Surg*  
11 2006;243(4):479-85. doi: 10.1097/01.sla.0000205825.34452.43  
12  
13  
14  
15 18. Brusselaers N, Vall A, Mattsson F, et al. Tumour staging of oesophageal cancer in the  
16 Swedish Cancer Registry: A nationwide validation study. *Acta Oncol* 2015;54(6):903-8. doi:  
17 10.3109/0284186X.2015.1020968  
18  
19  
20  
21 19. Greene FL, Sobin LH. The TNM system: our language for cancer care. *J Surg Oncol*  
22 2002;80(3):119-20. doi: 10.1002/jso.10114  
23  
24  
25  
26 20. Naessen T, Parker R, Persson I, et al. Time trends in incidence rates of first hip fracture in  
27 the Uppsala Health Care Region, Sweden, 1965-1983. *Am J Epidemiol* 1989;130(2):289-99.  
28  
29  
30  
31 21. Lagergren K, Derogar M. Validation of oesophageal cancer surgery data in the Swedish  
32 Patient Registry. *Acta Oncol* 2012;51(1):65-8. doi: 10.3109/0284186X.2011.633932  
33  
34  
35 22. Armitage JN, van der Meulen JH, Royal College of Surgeons Co-morbidity Consensus G.  
36 Identifying co-morbidity in surgical patients using administrative data with the Royal College  
37 of Surgeons Charlson Score. *Br J Surg* 2010;97(5):772-81. doi: 10.1002/bjs.6930  
38  
39  
40  
41 23. Ludvigsson JF, Andersson E, Ekblom A, et al. External review and validation of the  
42 Swedish national inpatient register. *BMC Public Health* 2011;11:450. doi: 10.1186/1471-  
43 2458-11-450  
44  
45  
46  
47 24. Brooke HL, Talback M, Hornblad J, et al. The Swedish cause of death register. *Eur J*  
48 *Epidemiol* 2017;32(9):765-73. doi: 10.1007/s10654-017-0316-1  
49  
50  
51  
52 25. Cutler SJ, Ederer F. Maximum utilization of the life table method in analyzing survival. *J*  
53 *Chronic Dis* 1958;8(6):699-712.  
54  
55  
56  
57  
58  
59  
60

- 1  
2  
3 26. Zeng H, Zheng R, Guo Y, et al. Cancer survival in China, 2003-2005: a population-based  
4 study. *Int J Cancer* 2015;136(8):1921-30. doi: 10.1002/ijc.29227  
5  
6  
7 27. Sjoquist KM, Burmeister BH, Smithers BM, et al. Survival after neoadjuvant  
8 chemotherapy or chemoradiotherapy for resectable oesophageal carcinoma: an updated meta-  
9 analysis. *Lancet Oncol* 2011;12(7):681-92. doi: 10.1016/S1470-2045(11)70142-5  
10  
11  
12 28. Little AG, Lerut AE, Harpole DH, et al. The Society of Thoracic Surgeons practice  
13 guidelines on the role of multimodality treatment for cancer of the esophagus and  
14 gastroesophageal junction. *Ann Thorac Surg* 2014;98(5):1880-5. doi:  
15  
16 10.1016/j.athoracsur.2014.07.069  
17  
18  
19 29. Pottgen C, Stuschke M. Radiotherapy versus surgery within multimodality protocols for  
20 esophageal cancer--a meta-analysis of the randomized trials. *Cancer Treat Rev*  
21 2012;38(6):599-604. doi: 10.1016/j.ctrv.2011.10.005  
22  
23  
24 30. Stahl M, Stuschke M, Lehmann N, et al. Chemoradiation with and without surgery in  
25 patients with locally advanced squamous cell carcinoma of the esophagus. *J Clin Oncol*  
26 2005;23(10):2310-7. doi: 10.1200/JCO.2005.00.034  
27  
28  
29 31. Kleinberg L, Forastiere AA. Chemoradiation in the management of esophageal cancer. *J*  
30 *Clin Oncol* 2007;25(26):4110-7. doi: 10.1200/JCO.2007.12.0881  
31  
32  
33 32. Bohanes P, Yang D, Chhibar RS, et al. Influence of sex on the survival of patients with  
34 esophageal cancer. *J Clin Oncol* 2012;30(18):2265-72. doi: 10.1200/JCO.2011.38.8751  
35  
36  
37 33. Ellison LF. Differences in cancer survival in Canada by sex. *Health Rep* 2016;27(4):19-  
38 27.  
39  
40  
41 34. Bus P, Lemmens VE, van Oijen MG, et al. Prognostic factors for medium- and long-term  
42 survival of esophageal cancer patients in the Netherlands. *J Surg Oncol* 2014;109(5):465-71.  
43  
44  
45 35. Zhang J, Garfield D, Jiang Y, et al. Does sex affect survival of patients with squamous  
46 cell esophageal cancer? *J Clin Oncol* 2013;31(6):815-6. doi: 10.1200/JCO.2012.45.5071  
47  
48  
49  
50  
51  
52  
53  
54  
55  
56  
57  
58  
59  
60

- 1  
2  
3 36. Ueo H, Matsuoka H, Sugimachi K, et al. Inhibitory effects of estrogen on the growth of a  
4 human esophageal carcinoma cell line. *Cancer Res* 1990;50(22):7212-5.  
5  
6  
7 37. Utsumi Y, Nakamura T, Nagasue N, et al. Role of estrogen receptors in the growth of  
8 human esophageal carcinoma. *Cancer* 1989;64(1):88-93.  
9  
10  
11 38. Nozoe T, Oyama T, Takenoyama M, et al. Significance of immunohistochemical  
12 expression of estrogen receptors alpha and beta in squamous cell carcinoma of the esophagus.  
13  
14  
15 *Clin Cancer Res* 2007;13(14):4046-50. doi: 10.1158/1078-0432.CCR-07-0449  
16  
17  
18 39. Wang BJ, Zhang B, Yan SS, et al. Hormonal and reproductive factors and risk of  
19 esophageal cancer in women: a meta-analysis. *Dis Esophagus* 2016;29(5):448-54. doi:  
20  
21 10.1111/dote.12349  
22  
23  
24 40. Brusselaers N, Maret-Ouda J, Konings P, et al. Menopausal hormone therapy and the risk  
25 of esophageal and gastric cancer. *Int J Cancer* 2017;140(7):1693-99. doi: 10.1002/ijc.30588  
26  
27  
28 41. Galdas PM, Cheater F, Marshall P. Men and health help-seeking behaviour: literature  
29 review. *J Adv Nurs* 2005;49(6):616-23. doi: 10.1111/j.1365-2648.2004.03331.x [published  
30  
31 Online First: 2005/03/02]  
32  
33  
34 42. Wingard DL. The sex differential in morbidity, mortality, and lifestyle. *Annu Rev Public*  
35  
36 *Health* 1984;5:433-58. doi: 10.1146/annurev.pu.05.050184.002245 [published Online First:  
37  
38 1984/01/01]  
39  
40  
41  
42  
43  
44  
45  
46  
47  
48  
49  
50  
51  
52  
53  
54  
55  
56  
57  
58  
59  
60

1  
2  
3  
4  
5  
6  
7  
8  
9  
10  
11  
12  
13  
14  
15  
16  
17  
18  
19  
20  
21  
22  
23  
24  
25  
26  
27  
28  
29  
30  
31  
32  
33  
34  
35  
36  
37  
38  
39  
40  
41  
42  
43  
44  
45  
46  
47

**Table 1:** Observed and relative 1- and 5-year survival across calendar periods in oesophageal adenocarcinoma and squamous cell carcinoma, stratified by treatment strategy in 1990-2013, with follow-up until 2017.

| Calendar period     | Oesophageal adenocarcinoma |          |                                 |            |                                 |            | Oesophageal squamous cell carcinoma |          |                                 |            |                                 |            |
|---------------------|----------------------------|----------|---------------------------------|------------|---------------------------------|------------|-------------------------------------|----------|---------------------------------|------------|---------------------------------|------------|
|                     | Patients                   |          | Observed survival in % (95% CI) |            | Relative survival in % (95% CI) |            | Patients                            |          | Observed survival in % (95% CI) |            | Relative survival in % (95% CI) |            |
|                     | Number (%)                 | Mean age | 1 year                          | 5 year     | 1 year                          | 5 year     | Number (%)                          | Mean age | 1 year                          | 5 year     | 1 year                          | 5 year     |
| <b>All patients</b> |                            |          |                                 |            |                                 |            |                                     |          |                                 |            |                                 |            |
| 1990-1994           | 332 (9)                    | 71       | 33 (28-39)                      | 10 (7-14)  | 35 (30-41)                      | 12 (8-16)  | 1148 (25)                           | 70       | 31 (28-33)                      | 8 (6-9)    | 32 (29-35)                      | 9 (7-11)   |
| 1995-1999           | 557 (15)                   | 70       | 35 (31-39)                      | 11 (8-13)  | 37 (33-41)                      | 13 (10-16) | 1014 (22)                           | 70       | 32 (29-35)                      | 10 (8-12)  | 33 (30-36)                      | 12 (9-14)  |
| 2000-2004           | 860 (23)                   | 70       | 39 (36-43)                      | 11 (9-13)  | 41 (38-45)                      | 13 (11-16) | 931 (20)                            | 70       | 34 (30-37)                      | 7 (6-9)    | 35 (32-38)                      | 9 (7-11)   |
| 2005-2009           | 1054 (28)                  | 69       | 39 (36-42)                      | 12 (10-14) | 41 (38-44)                      | 14 (12-16) | 861 (19)                            | 70       | 34 (30-37)                      | 10 (8-12)  | 35 (32-38)                      | 11 (9-14)  |
| 2010-2013           | 991 (26)                   | 71       | 40 (37-43)                      | 13 (11-15) | 41 (38-45)                      | 15 (12-17) | 677 (15)                            | 70       | 34 (31-38)                      | 11 (9-13)  | 36 (32-39)                      | 12 (10-15) |
| <b>Surgery</b>      |                            |          |                                 |            |                                 |            |                                     |          |                                 |            |                                 |            |
| 1990-1994           | 126 (11)                   | 66       | 51 (42-60)                      | 22 (15-29) | 54 (44-63)                      | 27 (18-36) | 346 (31)                            | 65       | 57 (52-62)                      | 20 (15-24) | 60 (55-66)                      | 24 (19-29) |
| 1995-1999           | 191 (17)                   | 65       | 68 (61-75)                      | 29 (22-35) | 72 (65-79)                      | 35 (27-42) | 275 (25)                            | 64       | 64 (59-70)                      | 25 (20-31) | 68 (62-74)                      | 31 (24-37) |
| 2000-2004           | 275 (24)                   | 66       | 72 (67-78)                      | 27 (21-32) | 76 (71-82)                      | 31 (25-37) | 183 (16)                            | 65       | 69 (63-76)                      | 25 (18-31) | 73 (66-80)                      | 29 (22-36) |
| 2005-2009           | 277 (24)                   | 64       | 79 (75-84)                      | 38 (32-43) | 83 (78-88)                      | 43 (36-49) | 193 (17)                            | 64       | 70 (64-77)                      | 29 (23-35) | 74 (67-80)                      | 33 (26-41) |
| 2010-2013           | 262 (23)                   | 66       | 83 (78-87)                      | 40 (34-46) | 86 (82-91)                      | 45 (38-51) | 119 (11)                            | 66       | 83 (76-90)                      | 39 (30-48) | 87 (80-94)                      | 43 (33-54) |
| <b>No surgery</b>   |                            |          |                                 |            |                                 |            |                                     |          |                                 |            |                                 |            |
| 1990-1994           | 206 (8)                    | 74       | 23 (17-29)                      | 3 (0-5)    | 24 (18-30)                      | 3 (0-6)    | 802 (23)                            | 72       | 19 (16-22)                      | 2 (1-3)    | 20 (17-23)                      | 3 (1-4)    |
| 1995-1999           | 366 (14)                   | 72       | 18 (14-22)                      | 1 (0-2)    | 19 (15-23)                      | 1 (0-2)    | 739 (21)                            | 72       | 19 (17-22)                      | 4 (2-5)    | 21 (18-24)                      | 5 (3-6)    |
| 2000-2004           | 585 (22)                   | 72       | 24 (20-27)                      | 4 (2-6)    | 25 (21-29)                      | 5 (3-7)    | 748 (21)                            | 72       | 25 (22-28)                      | 3 (2-5)    | 26 (23-29)                      | 4 (2-5)    |
| 2005-2009           | 777 (29)                   | 71       | 24 (21-27)                      | 3 (2-5)    | 25 (22-29)                      | 4 (2-5)    | 668 (19)                            | 71       | 23 (20-26)                      | 4 (3-6)    | 24 (21-27)                      | 5 (3-7)    |
| 2010-2013           | 729 (27)                   | 73       | 24 (21-27)                      | 3 (2-5)    | 25 (22-29)                      | 4 (2-5)    | 558 (16)                            | 71       | 24 (20-27)                      | 5 (3-7)    | 25 (21-29)                      | 6 (4-8)    |

**Table 2:** Observed 5-year survival and adjusted hazard ratios (HR) with 95% confidence intervals (CI) for oesophageal adenocarcinoma and oesophageal squamous-cell carcinoma in 1990-2013, with follow-up until 2017.

|                     |           | Oesophageal adenocarcinoma |                          |                  | Oesophageal squamous-cell carcinoma |                          |                  |
|---------------------|-----------|----------------------------|--------------------------|------------------|-------------------------------------|--------------------------|------------------|
| Covariate           | Category  | Patients Number (%)        | 5-year survival (95% CI) | HR (95% CI)*     | Patients Number (%)                 | 5-year survival (95% CI) | HR (95% CI)*     |
| <b>All patients</b> |           |                            |                          |                  |                                     |                          |                  |
| Calendar period     | 1990-1994 | 332 (9)                    | 10 (7-14)                | 1.17 (1.02-1.33) | 1148 (25)                           | 8 (6-9)                  | 1.19 (1.07-1.31) |
|                     | 1995-1999 | 557 (15)                   | 11 (8-13)                | 1.11 (0.99-1.24) | 1014 (22)                           | 10 (8-12)                | 1.11 (1.00-1.23) |
|                     | 2000-2004 | 860 (23)                   | 11 (9-13)                | 1.07 (0.97-1.18) | 931 (20)                            | 7 (6-9)                  | 1.13 (1.01-1.25) |
|                     | 2005-2009 | 1054 (28)                  | 12 (10-14)               | 1.04 (0.94-1.16) | 861 (19)                            | 10 (8-12)                | 1.07 (0.96-1.19) |
|                     | 2010-2013 | 991 (26)                   | 13 (11-15)               | 1 (reference)    | 677 (15)                            | 11 (9-13)                | 1 (reference)    |
| Age (years)         | <60       | 686 (18)                   | 18 (15-21)               | 1 (reference)    | 787 (17)                            | 14 (12-17)               | 1 (reference)    |
|                     | 60-69     | 1079 (28)                  | 16 (13-18)               | 1.05 (0.94-1.16) | 1344 (29)                           | 12 (10-14)               | 1.11 (1.01-1.22) |
|                     | 70-79     | 1166 (31)                  | 12 (10-13)               | 1.25 (1.13-1.39) | 1588 (34)                           | 8 (7-9)                  | 1.38 (1.26-1.51) |
|                     | ≥80       | 863 (23)                   | 2 (1-3)                  | 1.99 (1.78-2.23) | 912 (20)                            | 2 (1-2)                  | 2.06 (1.86-2.28) |
| Sex                 | Male      | 3098 (82)                  | 12 (11-13)               | 1 (reference)    | 2938 (63)                           | 8 (7-9)                  | 1 (reference)    |
|                     | Female    | 696 (18)                   | 10 (8-12)                | 1.04 (0.95-1.14) | 1693 (37)                           | 11 (9-12)                | 0.83 (0.78-0.89) |
| Comorbidity score   | 0         | 2096 (55)                  | 14 (13-15)               | 1 (reference)    | 2367 (51)                           | 11 (10-13)               | 1 (reference)    |
|                     | 1         | 1115 (29)                  | 11 (9-12)                | 1.11 (1.03-1.20) | 1598 (35)                           | 7 (6-9)                  | 1.15 (1.08-1.23) |
|                     | ≥2        | 583 (15)                   | 6 (4-8)                  | 1.27 (1.15-1.40) | 666 (14)                            | 4 (2-5)                  | 1.45 (1.32-1.59) |
| <b>Surgery</b>      |           |                            |                          |                  |                                     |                          |                  |
| Calendar period     | 1990-1994 | 126 (11)                   | 22 (15-29)               | 2.02 (1.56-2.61) | 346 (31)                            | 20 (15-24)               | 2.03 (1.56-2.63) |
|                     | 1995-1999 | 191 (17)                   | 29 (22-35)               | 1.46 (1.16-1.83) | 275 (25)                            | 25 (20-31)               | 1.62 (1.24-2.13) |
|                     | 2000-2004 | 275 (24)                   | 27 (21-32)               | 1.45 (1.18-1.79) | 183 (16)                            | 25 (18-31)               | 1.53 (1.15-2.04) |
|                     | 2005-2009 | 277 (24)                   | 38 (32-43)               | 1.07 (0.86-1.33) | 193 (17)                            | 29 (23-35)               | 1.41 (1.06-1.88) |
|                     | 2010-2013 | 262 (23)                   | 40 (34-46)               | 1 (reference)    | 119 (11)                            | 39 (30-48)               | 1 (reference)    |
| Age (years)         | <60       | 286 (25)                   | 40 (35-46)               | 1 (reference)    | 317 (28)                            | 25 (20-30)               | 1 (reference)    |
|                     | 60-69     | 423 (37)                   | 31 (26-35)               | 1.25 (1.03-1.51) | 443 (40)                            | 28 (24-32)               | 1.00 (0.85-1.19) |
|                     | 70-79     | 370 (33)                   | 30 (25-34)               | 1.28 (1.05-1.56) | 328 (29)                            | 24 (19-29)               | 1.13 (0.94-1.35) |
|                     | ≥80       | 52 (5)                     | 15 (5-24)                | 1.98 (1.41-2.77) | 28 (3)                              | 11 (-1-22)               | 1.61 (1.07-2.45) |
| Sex                 | Male      | 987 (87)                   | 31 (28-34)               | 1 (reference)    | 729 (65)                            | 21 (18-24)               | 1 (reference)    |
|                     | Female    | 144 (13)                   | 37 (29-45)               | 0.84 (0.68-1.05) | 387 (35)                            | 33 (29-38)               | 0.71 (0.61-0.83) |
| Comorbidity         | 0         | 733 (65)                   | 33 (29-36)               | 1 (reference)    | 698 (63)                            | 27 (24-31)               | 1 (reference)    |
|                     | 1         | 299 (26)                   | 32 (27-38)               | 1.05 (0.89-1.23) | 340 (30)                            | 23(18-27)                | 1.13 (0.97-1.31) |
|                     | ≥2        | 99 (9)                     | 26 (18-36)               | 1.19 (0.93-1.53) | 78 (7)                              | 22 (12-31)               | 1.20 (0.92-1.57) |
| <b>No surgery</b>   |           |                            |                          |                  |                                     |                          |                  |
| Calendar period     | 1990-1994 | 206 (8)                    | 3 (0-5)                  | 1.10 (0.94-1.29) | 802 (23)                            | 2 (1-3)                  | 1.24 (1.11-1.39) |
|                     | 1995-1999 | 366 (14)                   | 1 (0-2)                  | 1.14 (1.00-1.30) | 739 (21)                            | 4 (2-5)                  | 1.15 (1.02-1.28) |
|                     | 2000-2004 | 585 (22)                   | 4 (2-6)                  | 1.02 (0.91-1.13) | 748 (21)                            | 3 (2-5)                  | 1.06 (0.95-1.19) |
|                     | 2005-2009 | 777 (29)                   | 3 (2-5)                  | 1.00 (0.90-1.11) | 668 (19)                            | 4 (3-6)                  | 1.06 (0.95-1.19) |
|                     | 2010-2013 | 729 (27)                   | 3 (2-5)                  | 1 (reference)    | 558 (16)                            | 5 (3-7)                  | 1 (reference)    |
| Age (years)         | <60       | 400 (15)                   | 3 (1-4)                  | 1 (reference)    | 470(13)                             | 7 (5-9)                  | 1 (reference)    |
|                     | 60-69     | 656 (25)                   | 6 (4-7)                  | 0.91 (0.80-1.04) | 901 (26)                            | 4 (3-5)                  | 1.07 (0.95-1.20) |
|                     | 70-79     | 796 (30)                   | 3 (2-4)                  | 1.05 (0.93-1.19) | 1260 (36)                           | 4 (3-5)                  | 1.19 (1.06-1.32) |
|                     | ≥80       | 811 (30)                   | 1 (0-2)                  | 1.21 (1.06-1.37) | 884 (25)                            | 1 (1-2)                  | 1.42 (1.26-1.60) |
| Sex                 | Male      | 2111 (79)                  | 3 (2-4)                  | 1 (reference)    | 2209 (63)                           | 3 (2-4)                  | 1 (reference)    |
|                     | Female    | 552 (21)                   | 3 (1-4)                  | 1.00 (0.90-1.10) | 1306 (37)                           | 4 (3-5)                  | 0.86 (0.81-0.93) |
| Comorbidity score   | 0         | 1363 (51)                  | 4 (3-5)                  | 1 (reference)    | 1669 (47)                           | 5 (4-6)                  | 1 (reference)    |
|                     | 1         | 816 (31)                   | 3 (1-4)                  | 1.04 (0.95-1.14) | 1258 (36)                           | 3 (2-4)                  | 1.07 (0.99-1.15) |
|                     | ≥2        | 484 (18)                   | 2 (0-3)                  | 1.08 (0.97-1.20) | 588 (17)                            | 1 (0-2)                  | 1.30 (1.18-1.43) |

\* Adjusted for calendar period, age, sex and comorbidity.

**Table 3:** Hazard ratios (HR) with 95% confidence intervals (CI) of 5-year mortality after surgery for oesophageal adenocarcinoma and oesophageal squamous-cell carcinoma in 2005-2013, with follow-up until 2017.

| Covariates    | Oesophageal adenocarcinoma |                   |                       | Oesophageal squamous-cell carcinoma |                   |                       |
|---------------|----------------------------|-------------------|-----------------------|-------------------------------------|-------------------|-----------------------|
|               | Patients Number (%)        | Crude HR (95% CI) | Adjusted HR (95% CI)* | Patients Number (%)                 | Crude HR (95% CI) | Adjusted HR (95% CI)* |
| Tumour stage† |                            |                   |                       |                                     |                   |                       |
| 0-I           | 62 (12)                    | 1 (Reference)     | 1 (Reference)         | 34 (11)                             | 1 (Reference)     | 1 (Reference)         |
| II            | 221 (41)                   | 2.53 (1.54-4.14)  | 2.37 (1.44-3.90)      | 143 (46)                            | 2.19 (1.25-3.83)  | 2.20 (1.25-3.87)      |
| III-IV        | 186 (35)                   | 4.14 (2.53-6.76)  | 4.04 (2.46-6.63)      | 98 (31)                             | 2.71 (1.53-4.79)  | 2.64 (1.48-4.71)      |
| Calendar      |                            |                   |                       |                                     |                   |                       |
| 2005-2009     | 277 (51)                   | 1.12 (0.88-1.41)  | 1.04 (0.82-1.32)      | 193 (62)                            | 1.42 (1.05-1.93)  | 1.48 (1.08-2.02)      |
| 2010-2013     | 262 (49)                   | 1 (Reference)     | 1 (Reference)         | 119 (38)                            | 1 (Reference)     | 1 (Reference)         |
| Age (years)   |                            |                   |                       |                                     |                   |                       |
| <60           | 138 (26)                   | 1 (Reference)     | 1 (Reference)         | 79 (25)                             | 1 (Reference)     | 1 (Reference)         |
| 60-69         | 227 (42)                   | 1.52 (1.11-2.08)  | 1.41 (1.02-1.94)      | 137 (44)                            | 0.88 (0.61-1.28)  | 0.81 (0.55-1.18)      |
| 70-79         | 148 (27)                   | 1.52 (1.08-2.14)  | 1.47 (1.03-2.08)      | 86 (28)                             | 1.23 (0.83-1.81)  | 1.21 (0.81-1.81)      |
| ≥80           | 26 (5)                     | 3.39 (2.05-5.60)  | 3.58 (2.14-5.98)      | 10 (3)                              | 1.57 (0.71-3.48)  | 1.58 (0.71-3.53)      |
| Sex           |                            |                   |                       |                                     |                   |                       |
| Male          | 470 (87)                   | 1 (Reference)     | 1 (Reference)         | 210 (67)                            | 1 (Reference)     | 1 (Reference)         |
| Female        | 69 (13)                    | 0.84 (0.59-1.19)  | 0.82 (0.57-1.18)      | 102 (33)                            | 0.67 (0.49-0.93)  | 0.66 (0.47-0.92)      |
| Comorbidity   |                            |                   |                       |                                     |                   |                       |
| 0             | 341 (63)                   | 1 (Reference)     | 1 (Reference)         | 195 (63)                            | 1 (Reference)     | 1 (Reference)         |
| 1             | 144 (27)                   | 1.04 (0.80-1.36)  | 0.95 (0.73-1.25)      | 86 (28)                             | 1.35 (0.98-1.87)  | 1.40 (1.01-1.95)      |
| ≥2            | 54 (10)                    | 1.07 (0.72-1.59)  | 1.02 (0.68-1.52)      | 31 (10)                             | 1.31 (0.82-2.12)  | 1.60 (0.98-2.62)      |

\* Adjusted for calendar period, age, sex, Charlson Comorbidity Index and tumour stage.

† 70 (13%) patients with oesophageal adenocarcinoma and 37 (12%) patients with oesophageal squamous-cell carcinoma had missing tumour stage.

## Figure Legends

**Figure 1.** Kaplan-Meier survival curves showing observed 5-year survival oesophageal adenocarcinoma (A) stratified by surgical treatment (yes or no). Patients undergoing oesophageal resection for adenocarcinoma (B) and not undergoing oesophageal resection for adenocarcinoma (C) are further stratified by calendar periods.

**Figure 2.** Kaplan-Meier survival curves showing observed 5-year survival oesophageal squamous cell carcinoma (A) stratified by surgical treatment (yes or no). Patients undergoing oesophageal resection for squamous cell carcinoma (B) and not undergoing oesophageal resection for squamous cell carcinoma (C) are further stratified by calendar periods.



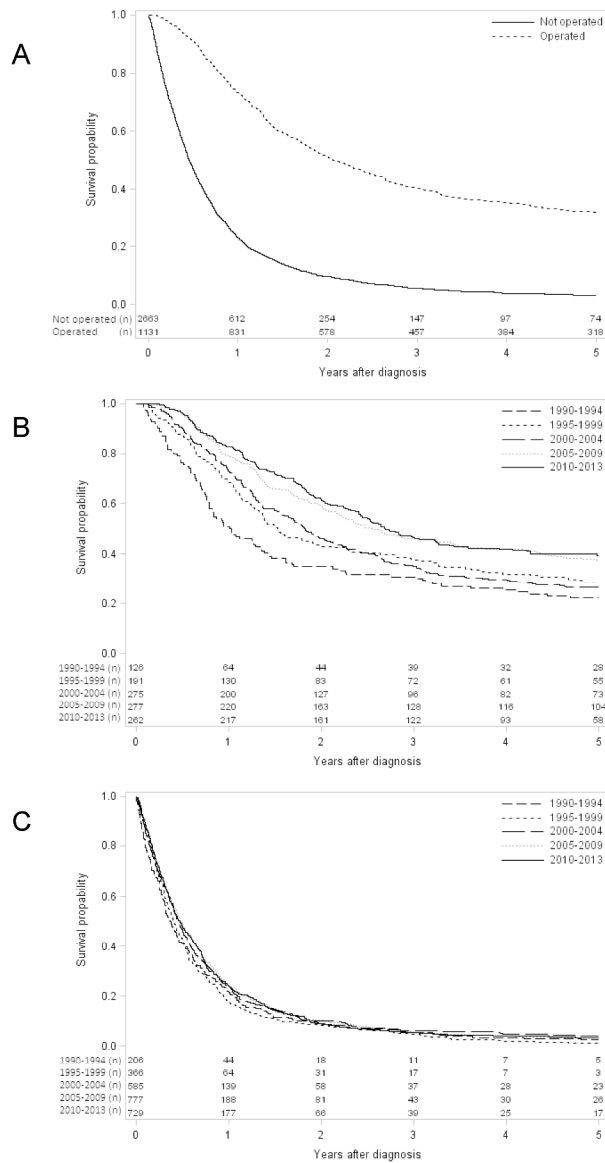

Kaplan-Meier survival curves showing observed 5-year survival oesophageal adenocarcinoma (A) stratified by surgical treatment (yes or no). Patients undergoing oesophageal resection for adenocarcinoma (B) and not undergoing oesophageal resection for adenocarcinoma (C) are further stratified by calendar periods.

275x397mm (300 x 300 DPI)

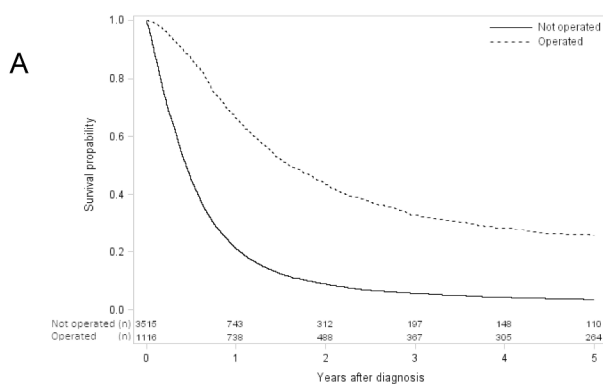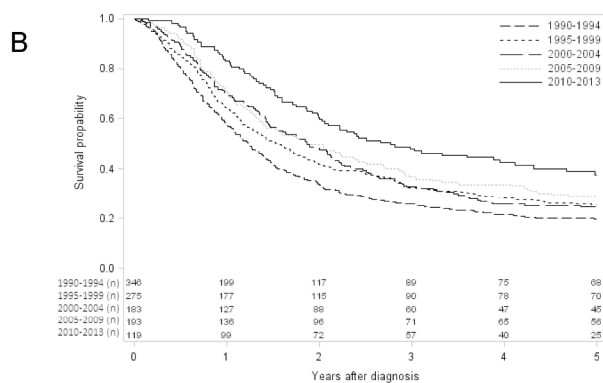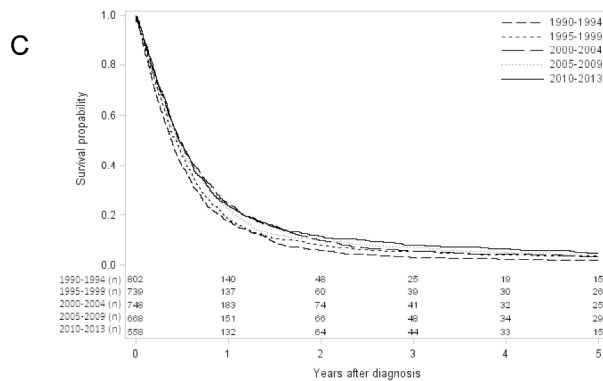

Kaplan-Meier survival curves showing observed 5-year survival oesophageal squamous cell carcinoma (A) stratified by surgical treatment (yes or no). Patients undergoing oesophageal resection for squamous cell carcinoma (B) and not undergoing oesophageal resection for squamous cell carcinoma (C) are further stratified by calendar periods.

275x397mm (300 x 300 DPI)

**STROBE 2007 (v4) Statement—Checklist of items that should be included in reports of *cohort studies***

| Section/Topic                | Item # | Recommendation                                                                                                                                                                       | Reported on page # |
|------------------------------|--------|--------------------------------------------------------------------------------------------------------------------------------------------------------------------------------------|--------------------|
| Title and abstract           | 1      | (a) Indicate the study's design with a commonly used term in the title or the abstract                                                                                               | 1-2                |
|                              |        | (b) Provide in the abstract an informative and balanced summary of what was done and what was found                                                                                  | 2-3                |
| <b>Introduction</b>          |        |                                                                                                                                                                                      |                    |
| Background/rationale         | 2      | Explain the scientific background and rationale for the investigation being reported                                                                                                 | 5                  |
| Objectives                   | 3      | State specific objectives, including any prespecified hypotheses                                                                                                                     | 5                  |
| <b>Methods</b>               |        |                                                                                                                                                                                      |                    |
| Study design                 | 4      | Present key elements of study design early in the paper                                                                                                                              | 6                  |
| Setting                      | 5      | Describe the setting, locations, and relevant dates, including periods of recruitment, exposure, follow-up, and data collection                                                      | 6                  |
| Participants                 | 6      | (a) Give the eligibility criteria, and the sources and methods of selection of participants. Describe methods of follow-up                                                           | 6-7                |
|                              |        | (b) For matched studies, give matching criteria and number of exposed and unexposed                                                                                                  |                    |
| Variables                    | 7      | Clearly define all outcomes, exposures, predictors, potential confounders, and effect modifiers. Give diagnostic criteria, if applicable                                             | 6-8                |
| Data sources/<br>measurement | 8*     | For each variable of interest, give sources of data and details of methods of assessment (measurement). Describe comparability of assessment methods if there is more than one group | 6-8                |
| Bias                         | 9      | Describe any efforts to address potential sources of bias                                                                                                                            | 6                  |
| Study size                   | 10     | Explain how the study size was arrived at                                                                                                                                            | 6                  |
| Quantitative variables       | 11     | Explain how quantitative variables were handled in the analyses. If applicable, describe which groupings were chosen and why                                                         | 8                  |
| Statistical methods          | 12     | (a) Describe all statistical methods, including those used to control for confounding                                                                                                | 7-8                |
|                              |        | (b) Describe any methods used to examine subgroups and interactions                                                                                                                  | 8                  |
|                              |        | (c) Explain how missing data were addressed                                                                                                                                          | 8                  |
|                              |        | (d) If applicable, explain how loss to follow-up was addressed                                                                                                                       | N/A                |
|                              |        | (e) Describe any sensitivity analyses                                                                                                                                                | N/A                |
| <b>Results</b>               |        |                                                                                                                                                                                      |                    |

|                          |     |                                                                                                                                                                                                              |              |
|--------------------------|-----|--------------------------------------------------------------------------------------------------------------------------------------------------------------------------------------------------------------|--------------|
| Participants             | 13* | (a) Report numbers of individuals at each stage of study—eg numbers potentially eligible, examined for eligibility, confirmed eligible, included in the study, completing follow-up, and analysed            | 10           |
|                          |     | (b) Give reasons for non-participation at each stage                                                                                                                                                         | N/A          |
|                          |     | (c) Consider use of a flow diagram                                                                                                                                                                           | N/A          |
| Descriptive data         | 14* | (a) Give characteristics of study participants (eg demographic, clinical, social) and information on exposures and potential confounders                                                                     | 10, 23-25    |
|                          |     | (b) Indicate number of participants with missing data for each variable of interest                                                                                                                          | 24-25        |
|                          |     | (c) Summarise follow-up time (eg, average and total amount)                                                                                                                                                  | N/A          |
| Outcome data             | 15* | Report numbers of outcome events or summary measures over time                                                                                                                                               | 10-14, 23-25 |
| Main results             | 16  | (a) Give unadjusted estimates and, if applicable, confounder-adjusted estimates and their precision (eg, 95% confidence interval). Make clear which confounders were adjusted for and why they were included | 23-25        |
|                          |     | (b) Report category boundaries when continuous variables were categorized                                                                                                                                    | 8, 24-25     |
|                          |     | (c) If relevant, consider translating estimates of relative risk into absolute risk for a meaningful time period                                                                                             | 23           |
| Other analyses           | 17  | Report other analyses done—eg analyses of subgroups and interactions, and sensitivity analyses                                                                                                               | 12-13, 24-25 |
| <b>Discussion</b>        |     |                                                                                                                                                                                                              |              |
| Key results              | 18  | Summarise key results with reference to study objectives                                                                                                                                                     | 15           |
| <b>Limitations</b>       |     |                                                                                                                                                                                                              |              |
| Interpretation           | 20  | Give a cautious overall interpretation of results considering objectives, limitations, multiplicity of analyses, results from similar studies, and other relevant evidence                                   | 15-16        |
| Generalisability         | 21  | Discuss the generalisability (external validity) of the study results                                                                                                                                        | 17           |
| <b>Other information</b> |     |                                                                                                                                                                                                              |              |
| Funding                  | 22  | Give the source of funding and the role of the funders for the present study and, if applicable, for the original study on which the present article is based                                                | 4            |

\*Give information separately for cases and controls in case-control studies and, if applicable, for exposed and unexposed groups in cohort and cross-sectional studies.

**Note:** An Explanation and Elaboration article discusses each checklist item and gives methodological background and published examples of transparent reporting. The STROBE checklist is best used in conjunction with this article (freely available on the Web sites of PLoS Medicine at <http://www.plosmedicine.org/>, Annals of Internal Medicine at <http://www.annals.org/>, and Epidemiology at <http://www.epidem.com/>). Information on the STROBE Initiative is available at [www.strobe-statement.org](http://www.strobe-statement.org).
